# Control of Genetic Parasites Mediated Through Nucleoporin Evolution

Paul A. Rowley<sup>1,†</sup>, Kurt Patterson<sup>2</sup>, Suzanne B. Sandmeyer<sup>2</sup> and Sara L. Sawyer<sup>1</sup>

<sup>1</sup> BioFrontiers Institute, Department of Molecular Cellular and Developmental Biology,  
The University of Colorado at Boulder, Boulder, CO, 80303.

<sup>2</sup> Department of Biological Chemistry, School of Medicine, University of California, Irvine,  
Irvine, CA 92697-1700

<sup>†</sup>Current address: Department of Biological Sciences, University of Idaho, Moscow,  
Idaho, USA, 83844.

\* Corresponding author: [ssawyer@colorado.edu](mailto:ssawyer@colorado.edu)

## Abstract (250 words)

Yeasts serve as long-term hosts to several types of genetic parasites. Few studies have addressed the evolutionary trajectory of yeast genes that control the stable co-existence of these parasites with their host cell. In *Saccharomyces* yeasts, the retrovirus-like Ty retrotransposons must access the nucleus. We show that several genes encoding components of the yeast nuclear pore complex have experienced natural selection for substitutions that change the encoded protein sequence. By replacing these *S. cerevisiae* genes with orthologs from other *Saccharomyces* species, we discovered that natural sequence changes have affected the control of Ty retrotransposons. Specifically, changing the genetic sequence of *NUP84* or *NUP82* to what is found in other *Saccharomyces* species alters the retrotransposition of *S. cerevisiae* Ty1 and Ty3, respectively. Importantly, all tested housekeeping functions of *NUP84* and *NUP82* remained equivalent across species. The nuclear pore complex is the gatekeeper of the nucleus. It appears that nucleoporins are adapting to modulate the control of genetic parasites which access the nucleus, which is achieved despite the strict constraints imposed by host nuclear pore complex function.

## Introduction

The presence of Ty retrotransposons (Tys) in all species of *Saccharomyces* yeasts suggest that they have likely been coevolving together for about 20 million years [1,2]. Because Tys are strictly intracellular parasites, both the host (yeast) and Tys are aligned in benefitting from a controlled, sustained relationship that does not place the host at an evolutionary disadvantage [3]. This might even be thought of as a symbiotic relationship because, unlike most pathogenic viruses of higher eukaryotes, Tys are a force for genetic plasticity, driving adaptive changes within the yeast genome in response to changes in environmental conditions [4]. For this reason, it is thought that both Tys and the host genome have evolved mechanisms to attenuate unchecked Ty replication that would place an excessive burden on the host cell [3,5-10]. Thus, yeasts have likely experienced selection to control genetic parasites [11,12]. In turn, Tys may counter-adapt to host control strategies, or may adapt to modulate their own pathogenicity. Regardless of whether a Ty is thought of as a symbiont, or a “tamed” parasite, one can imagine that the host-parasite relationship must be finely honed within each yeast species, with different evolutionary strategies emerging over evolutionary time (in both yeast and Ty) to control Ty replication.

There are many examples of genetic parasites, including viruses and transposable elements, that must access the nucleus of a host cell in order to replicate. Thus, the nuclear envelope and nuclear gating represents a major barrier to these parasites in their eukaryotic hosts [13-15]. The movement of large macromolecules between the cytoplasm and the nucleus occurs through the nuclear pore complex. The nuclear pore complex is composed of multiple copies of approximately 30 different

proteins, referred to as nucleoporins, and is conserved between yeast and higher eukaryotic species, including humans [16-22]. Transport receptors, called karyopherins, facilitate the transport of cellular cargo through the nuclear pore [20,23]. Genetic parasites interact with a wide variety of nucleoporins and karyopherins to facilitate the nucleocytoplasmic transport of their proteins and complexes, or to re-localize useful or harmful host proteins [24-33].

*Saccharomyces* yeasts are eukaryotes chronically infected with DNA plasmids, single-stranded RNA viruses, double stranded RNA viruses, and retrotransposons [34,35]. Of these virus and virus-like elements, only Tys transit through the nuclear pore complex. There are five families of Tys in *S. cerevisiae*, Ty1 to Ty5, and all have an analogous lifecycle to mammalian retroviruses [36-38]. Tys have intracellular lifecycles (Figure 1), but can be transmitted to new hosts via mating [39]. The Ty lifecycle involves the shuttling of Ty RNAs (with associated host and viral proteins) in and out of the nucleus every replication cycle. Ty3 virus-like particles and proteins have been observed to cluster at the nuclear envelope and the cytoplasmic face of the nuclear pore complex [25,40,41]. Multiple Ty3 proteins (Gag3, p27 and CA) interact directly with nucleoporins, and the Ty1 and Ty3 integrase (IN) proteins contain nuclear localization signals [25,42-45]. Together, these factors presumably direct the nuclear ingress of Ty cDNA and associated proteins. After nuclear entry, integrase catalyzes the insertion of Ty cDNA into the host genome [46,47]. Tys must also exit the nucleus. Ty1 RNAs, after transcription in the nucleus, are thought to be stabilized and chaperoned from the

nucleus by the Gag protein [40].

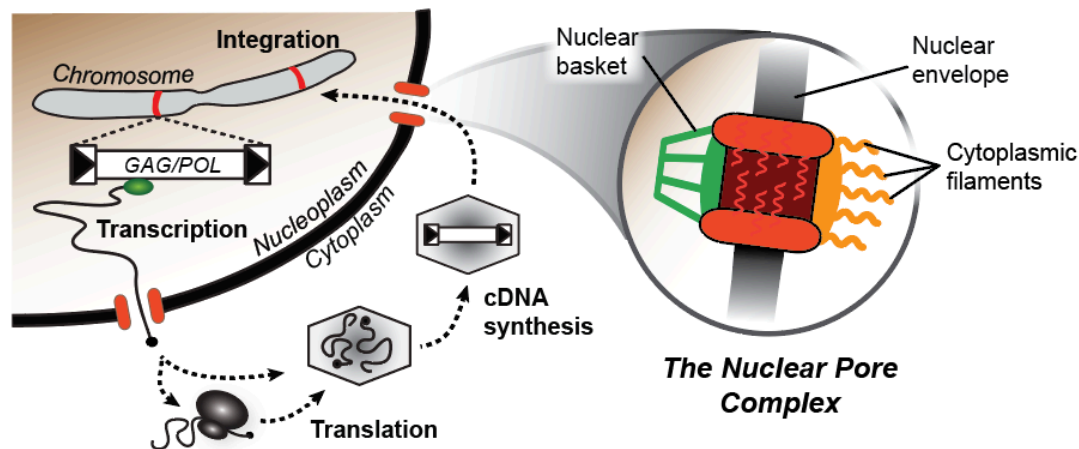

**Figure 1. The nuclear pore complex is important for Ty retrotransposition.**

*Left.* A generic schematic of the lifecycle of a Ty. Chromosomal copies of Ty, found in the yeast genome, produce full-length RNA transcripts that are exported from the nucleus. These transcripts are then translated and packaged within virus-like particles within the cytoplasm. Packaged RNAs are reverse transcribed into cDNA that is transported into the nucleus via the nuclear pore complex. The Ty integrase mediates insertion of the cDNA into the host genome at a new location (red stripes on the chromosome). *Right.* Simplified representation of the nuclear pore complex embedded in the nuclear envelope and sliced along its vertical axis. Filaments rich in phenylalanine and glycine (FG) radiate into the nucleoplasm, cytoplasm, and within the nuclear pore itself.

Because the lifecycle of Tys involves trafficking in and out of the nucleus, we investigated the hypothesis that nucleoporins might experience evolutionary pressure to control Ty nucleocytoplasmic transport. While evolution of host immune strategies is common [48-50], evolved resistances have not been extensively documented in large, essential cellular assemblages, such as the nuclear pore complex. At least six published high-throughput gene knockout screens have been conducted in order to identify genes important for the replication of Ty1 (four studies [51-54]) or Ty3 (two studies [55,56]). Among these studies, nine nucleoporins (Figure 2A) and four karyopherins (Figure S1) were identified as important for Ty replication. Several genes were identified in multiple

screens, as represented in the Venn diagrams shown in Figures 2A and S1. Interestingly, the knockout of some nuclear pore-related genes has been noted to reduce Ty retrotransposition, while the knockout of others increase it [57]. One possible interpretation of this confusing pattern is that there is a highly evolved relationship between yeasts and Tys. In some cases, Tys are successfully exploiting a nuclear pore protein for import/export. Knockout of such genes would reduce Ty retrotransposition. In other cases the host may have evolved to reduce Ty replication, for instance by evolving a nuclear pore protein that binds but does not transit Ty componentry, or that binds Ty componentry and mis-localizes it. Deleting these genes would increase Ty replication. There are likely to be additional nuclear pore complex-related genes, beyond those shown in Figures 2A and S1, that are involved in Ty replication. This is because genes essential to yeast viability are likely underrepresented in screens, given that gene knockouts of these are inviable.

To further explore the idea of evolved control of Tys, we looked at the evolutionary history of all known *Saccharomyces* nucleoporin genes, and found that 26 of 30 nucleoporins have changed very little during *Saccharomyces* speciation and are evolving under purifying selection. However, four nucleoporins are evolving rapidly in a manner consistent with positive selection (*NUP1*, *NUP82*, *NUP84*, and *NUP116*). We wished to explore how this high level of protein-level sequence divergence between species would affect Ty control. For *NUP82* and *NUP84*, we engineered *S. cerevisiae* strains to express orthologs from other yeast species and then assayed the replicative success of different families of Tys within these otherwise isogenic yeast strains. We found that species-specific evolutionary differences in these nucleoporins affected the replication of either Ty1, Ty3, or both Ty families. *NUP84* appears to have experienced selection primarily to limit Ty1, while *NUP82* has experienced selection primarily to limit

Ty3. Moreover, Nup82p and Nup84p are integral to the nuclear pore complex structure that are essential for its proper functioning [58,59]. We find that these adaptive changes in *NUP82* and *NUP84* affect Ty replication, yet have accumulated under the constraints of strict conservation of nucleoporin host functions throughout *Saccharomyces* speciation.

## RESULTS

### ***NUP82* and *NUP84* have accumulated elevated levels of non-synonymous mutations.**

We first set out to determine which nuclear pore complex-related genes might be important in the evolved control of Tys. Obviously, genes that have remained unchanged over the speciation of *Saccharomyces* yeast would be unlikely to fall into this class. Instead, as a screening tool we sought genes that have diverged significantly in sequence from one yeast species to the next. We are particularly interested in genes with evidence for natural selection underlying these sequence changes, rather than genes that have diverged in sequence simply by the forces of random genetic drift. Natural selection can be detected in genes as follows. Typically, selection operates on non-synonymous substitutions (changing the encoded amino acid) more significantly than on nonsynonymous mutations (silent, not changing the encoded amino acids). Gene regions that have experienced repeated rounds of natural selection in favor of protein-altering mutation therefore exhibit a characteristic inflation of the rate of non-synonymous (dN) DNA substitutions compared to synonymous (dS) substitutions (denoted by  $dN/dS > 1$ ) [60]. Because non-synonymous mutations occur more often than synonymous mutations by random chance, computational models have been developed

that use statistical frameworks to account for these unequal substitution rates [61-63].

The mode of evolution that we are seeking ( $dN/dS > 1$ ) is considered to be somewhat rare in eukaryotic genes. Instead, most genes experience purifying selection ( $dN/dS < 1$ ), where protein sequence is conserved over evolutionary time due to the important and complex roles that most proteins play in cellular homeostasis.

We examined the evolution of 29 yeast genes encoding nucleoporins and 22 genes encoding karyopherins for evidence of codons with  $dN/dS > 1$ . For each gene, we gathered nucleotide sequences from six divergent *Saccharomyces* species (*S. cerevisiae*, *S. paradoxus*, *S. mikatae*, *S. kudriavzevii*, *S. arboricolus* and *S. bayanus*) [64-66]. Next, we constructed DNA alignments of the various genes and fit these to two different models of codon evolution using the Phylogenetic Analysis by Maximum Likelihood (PAML) package [63]. Evolutionary model M7 was used as our null model and assumes that all codons within a gene are evolving under purifying selection ( $dN/dS > 1$  not allowed), whereas model M8 allows for some codons to exhibit an elevated evolutionary rate ( $dN/dS \geq 1$ ). Model M7 was rejected in favor of M8 ( $p < 0.05$ ) for four nucleoporin genes: *NUP84*, *NUP1*, *NUP116* and *NUP82* (Figure 2B). The null model was not rejected for any karyopherins (Figure S1). Interestingly, one of these nucleoporin genes, *NUP84*, is also the only nuclear pore-related gene found in three different knockout screens as important for Ty retrotransposition (Figure 2A). *NUP133*, which was the only other nucleoporin found in more than one of the genetic screens (Figure 2A), is important for both Ty1 and Ty3 retrotransposition, but did not pass the threshold of significance ( $p = 0.11$ ; Figure 2B), and so was not investigated further. The remaining three nucleoporin genes under positive selection (*NUP1*, *NUP116* and *NUP82*) are essential genes within *S. cerevisiae* (Figure 2B, bottom), and of these, only *NUP116* has been directly shown to be involved with Ty replication [25].





We next evaluated *NUP84*, *NUP1*, *NUP116*, and *NUP82* with additional tests for positive selection, FEL and REL [67]. We found that all four nucleoporin genes showed evidence of positive selection using at least one of these additional tests (Figure 2C). Furthermore, three of these genes (*NUP1*, *NUP82*, and *NUP116*) were previously identified as evolving rapidly in a whole genome evolutionary study of five *Saccharomyces* yeast species performed by Scannell *et al.* [66]. In contrast, *NUP133* and four other nucleoporins with the least support for rejection of the M7 null model (*NDC1*, *NSP1*, *NUP57* and *SEH1*; Figure 2B), passed zero or only one of these tests (Figure 2C). We next turned to functionally testing the biological relevance of the observed evolutionary signatures identified within nuclear pore complex-related genes.

### **A novel GFP reporter of Ty retrotransposition.**

We first built a quantitative, GFP-based assay system for Ty retrotransposition, which is a variation of a previous assay used in this field [68]. In this system, a plasmid-mounted Ty1 genome from *Saccharomyces cerevisiae* was encoded on the Watson (sense) strand, and was engineered to contain an internal *GFP* gene on the Crick (anti-sense relative to the transcript) strand of the DNA (Figure 3A). To prevent its expression prior to retrotransposition, the *GFP* gene was engineered to contain an antisense intron (on the Watson strand). Thus, only after the full-length Ty1-*GFP* transcript has been spliced, reverse transcribed, and integrated into the *S. cerevisiae* genome can the *GFP* gene be expressed. This is further regulated by the inducible copper-sensitive *CUP1* promoter (Figure 3A). Experiments were performed with two different introns within the *GFP* gene in order to determine which was more efficiently spliced from the transcript produced. The more efficient splicing occurred using the *S. cerevisiae* *ACT1* intron (*ACT1i*) (Figure 3B). GFP-positive cells were only detected by flow cytometry after

galactose was added to the media to initiate Ty1 transcription, and after subsequent addition of CuSO<sub>4</sub> to the media to induce expression of the *GFP* reporter (Figure 3C). We tested our Ty1 retrotransposition reporter in isogenic strains deleted for five genes known to be important for efficient Ty1 retrotransposition: BY4741 *xrn1*Δ, *nup84*Δ, *nup133*Δ, *bud22*Δ, and *xrs2*Δ [51,52]. Indeed, we see a significant decrease in Ty1 retrotransposition in each deletion strain compared to the wild-type BY4741 background (Figure 3D). As a control, we show that a strain deleted for *NUP100*, which is important for Ty3 retrotransposition [55], but not known to be important for Ty1, supports a level of retrotransposition that is not significantly different from that of a wild-type strain (Figure 3D).

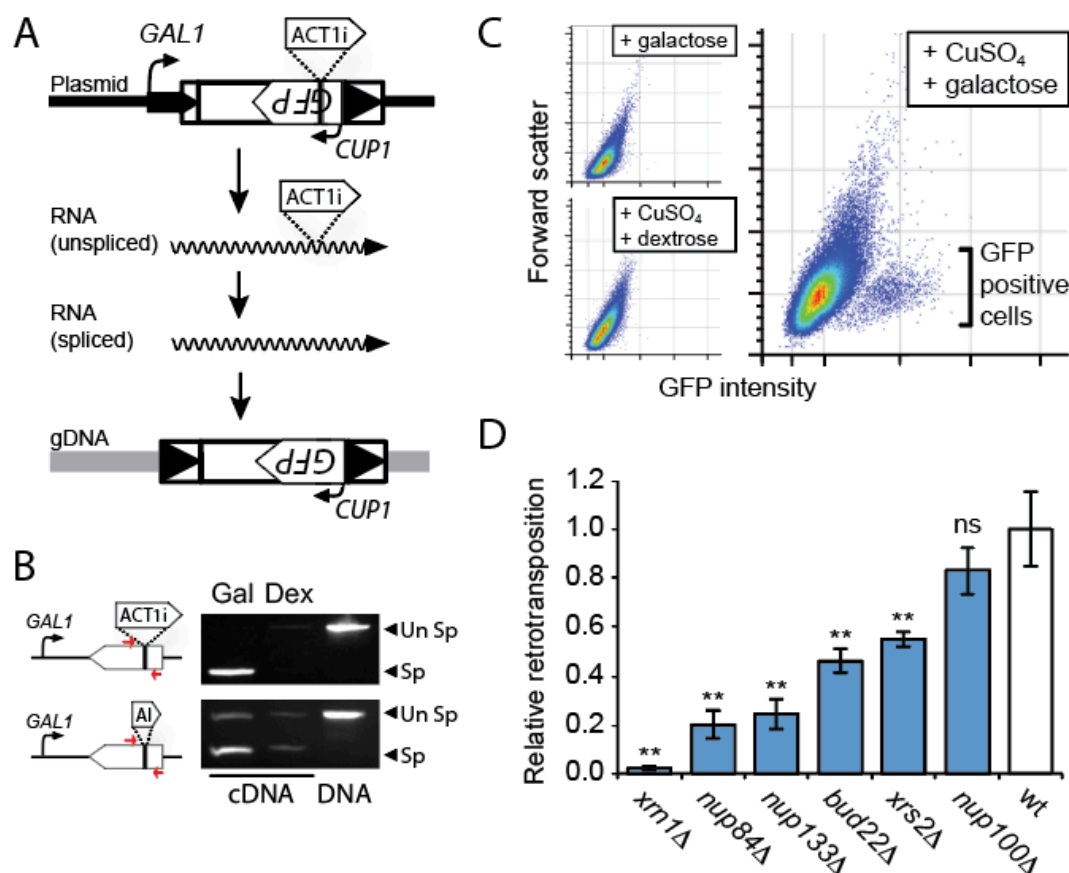

**Figure 3. A novel GFP-based reporter of Ty1 retrotransposition.** (A) An overview of the GFP-tagged Ty1 plasmid. Ty1 transcription is induced by

activation of the *GAL1* promoter, and produces a long Ty1 transcript that includes an internal *GFP* gene, and an *ACT1* intron (*ACT1i*) that is internal to *GFP*. The spliced transcript has *ACT1i* removed, and then provides a template for Ty1 protein production and reverse transcription. At the completion of the Ty1 lifecycle, Ty1 cDNA is imported into the nucleus and integrated into the *S. cerevisiae* genome. The *GFP* gene is then induced from the *CUP1* promoter by  $\text{CuSO}_4$  to report successful integration events. (B) RT-PCR was used to assess splicing of RNA with *ACT1i* versus an artificial intron (AI) within the *GFP* gene (primer positions marked by red arrows). Spliced RNA transcripts (Sp) were mainly detected upon induction of the transcription by the *GAL1* promoter using galactose (Gal). Growth on dextrose (Dex) inhibits the *GAL1* promoter and the production of RNA transcripts. Plasmid DNA was used as positive control to allow the PCR amplification across intron-containing *GFP*. “Un Sp” is unspliced RNA. (C) Flow cytometry analysis shows that *GFP* is only expressed under conditions of galactose induction of Ty1 expression followed by  $\text{CuSO}_4$  induction of *GFP*. (D) The effect of six different gene deletions on Ty1 retrotransposition, relative to wild-type *S. cerevisiae*. The relative retrotransposition was measured as a percent of GFP positive cells after induction of the Ty-GFP reporter, and was repeated independently, three times (error bars: standard error,  $n>3$ ; \*\*Tukey–Kramer method,  $p<0.05$ ). All values are normalized to wildtype.

### ***NUP84* evolution modulates Ty1 retrotransposition within *S. cerevisiae*.**

*NUP84* is under positive selection and disruption of the gene affects both Ty1 and Ty3 replication (Figure 1). We wished to test whether the evolution of *NUP84* over yeast speciation has altered interactions with Tys. To test this, we replaced *NUP84* within the *S. cerevisiae* genome (*NUP84<sup>S.cer</sup>*) with *NUP84* from diverse *Saccharomyces* species (*S. mikatae*, *S. kudriavzevii* and *S. bayanus*) using the method outlined in Figure 4A. These sequences encode Nup84p that are between 91% (*S. paradoxus*) and 84% (*S. bayanus*) identical to the *S. cerevisiae* protein. As an isogenic control, we re-complemented the *nup84Δ* strain with *S. cerevisiae NUP84*, as was done for the other *Saccharomyces* orthologs. Chromosomal complementation of *S. cerevisiae nup84Δ* with each heterospecific (other species) *NUP84* allele resulted in the restoration of normal growth and cellular morphology (Figure 4B and 4D), normal nuclear import (Figure 4C

and 4D), and normal transcription from the promoters used in our Ty1 *GFP*-based reporter (Figure 4E).

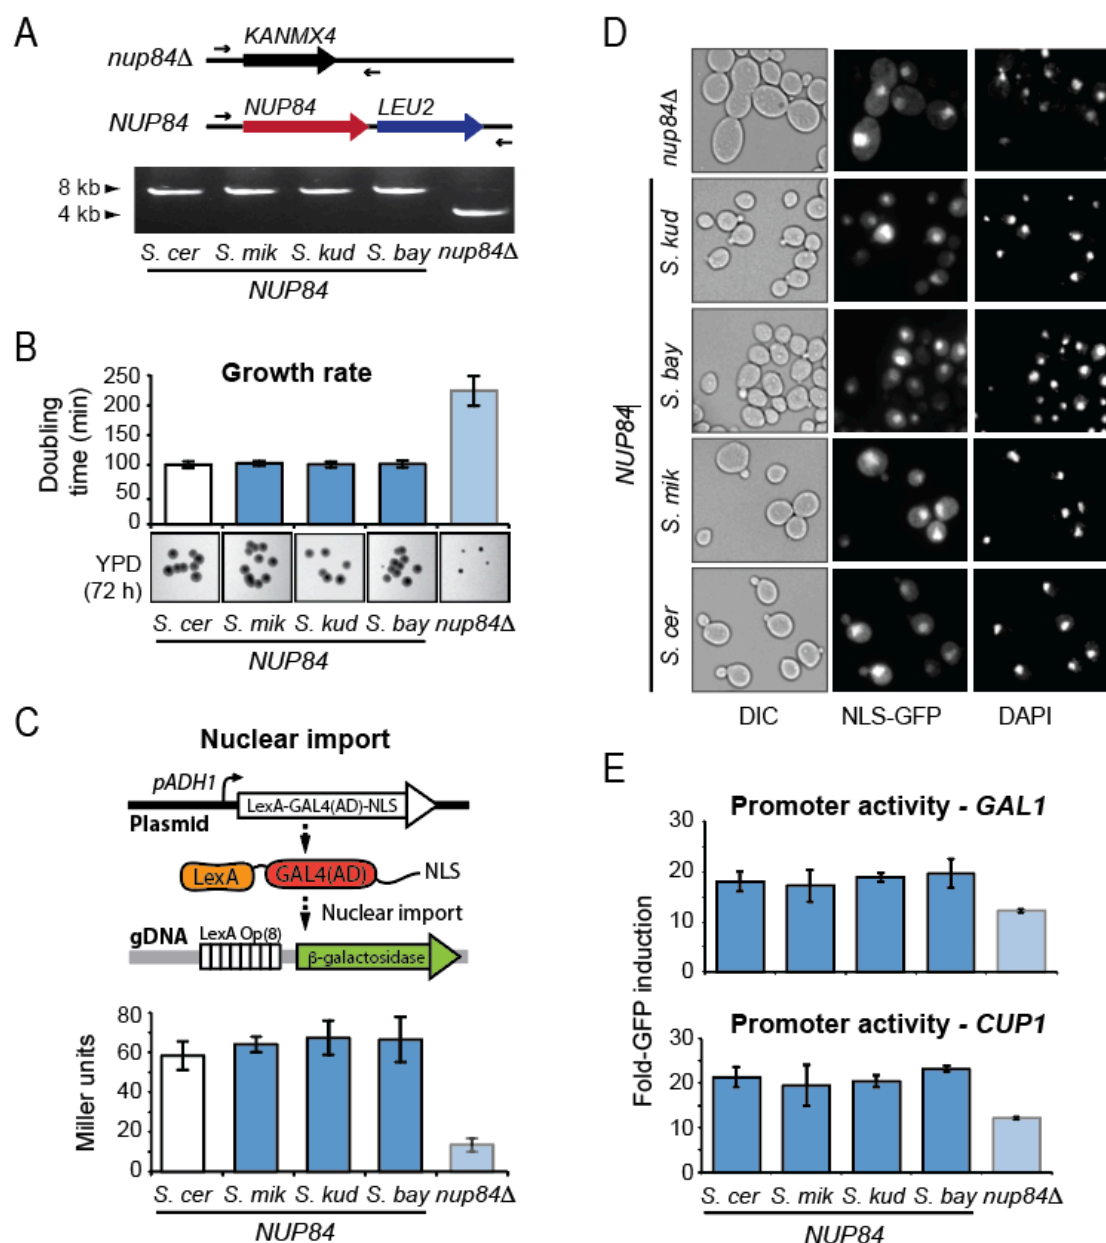

**Figure 4. The housekeeping functions of *NUP84* are conserved across divergent *Saccharomyces* species.** (A) *Top*. A schematic representation of the *NUP84* locus within *S. cerevisiae* engineered to either lack *NUP84* (*nup84Δ*) or to express heterospecific *NUP84* from *S. cerevisiae* (*S. cer*), *S. mikatae* (*S. mik*), *S. kudriavzevii* (*S. kud*) or *S. bayanus* (*S. bay*) along with the *LEU2* selectable marker. Successful genome engineering was confirmed by the PCR amplification (primers marked as arrows) across the *NUP84* locus to detect the replacement of *KANMX4* with *NUP84-LEU2*. (B) The doubling time of *NUP84*-complemented strains in liquid YPD medium compared to *nup84Δ*, and colony growth and

morphology after 72 h of growth on solid YPD medium. (C) General nuclear import function was assessed in the presence of heterospecific Nup84p or absence of Nup84p using a LexA-Gal4(AD) reporter protein with a SV40 nuclear localization signal (NLS) [69]. The LexA DNA binding domain and Gal4 activation domain (AD) initiate transcription of the  $\beta$ -galactosidase gene upon successful nuclear import. (D) Nuclear transport was also assessed by the steady-state localization of a GFP reporter protein containing a NLS from *PHO4* [70] and its cellular accumulation relative to a DAPI-stained nucleus within *NUP84* complemented *S. cerevisiae*. (E) The effect of *NUP84* complementation or deletion on the ability of *S. cerevisiae* to express *GFP* from each of the promoters used in the Ty1 *GFP*-based reporter (*GAL1* (top) or *CUP1* (bottom) promoters), using mean fluorescent intensity (MFI) detected by flow cytometry (error bars: standard error,  $n > 3$ ).

The null strain, and each of the four strains expressing wildtype of heterospecific *NUP84*, were transformed with the Ty1 *GFP* reporter described above. Relative to *nup84 $\Delta$* , cells complemented with *NUP84<sup>S.cer</sup>* increased Ty1 retrotransposition approximately 5-fold (Figure 5A). There were highly significant differences in the levels of retrotransposition among strains encoding heterospecific *NUP84* (one-way ANOVA,  $p = 8.2 \times 10^{-8}$ ), and levels of Ty1 retrotransposition were significantly different in strains containing *NUP84<sup>S.mik</sup>*, *NUP84<sup>S.kud</sup>*, and *NUP84<sup>S.bay</sup>* when compared to *NUP84<sup>S.cer</sup>* (Tukey–Kramer method,  $p < 0.05$ ) (Figure 5A). We found that replacement of *NUP84<sup>S.cer</sup>* with *NUP84<sup>S.kud</sup>* increased Ty1 retrotransposition by 32%, whereas *NUP84<sup>S.mik</sup>* and *NUP84<sup>S.bay</sup>* both significantly decreased retrotransposition by 21% and 35%, respectively. To verify the observed differences in control of Ty1 retrotransposition, we used Southern blotting to detect Ty1 integrations in the 5' UTR of the *SUF16* locus, as previously described [71]. We used our *GFP* reporter assay to initiate Ty1 retrotransposition, with Ty1 genomic integrations only detected after induction by galactose (Figure 5B). Similar to our *GFP* reporter assay, fewer integrations were detected within strains encoding *NUP84<sup>S.mik</sup>* and *NUP84<sup>S.bay</sup>* compared to *NUP84<sup>S.cer</sup>*. *NUP84<sup>S.cer</sup>* and *NUP84<sup>S.kud</sup>* had comparable levels of genomic integrations (Figure 5B). It is important to remember that these assays are conducted over a short period, yet Ty expand over time [5,6].

Therefore, even small differences in these assays would be expected to have significant fitness impacts on the host and on Ty.

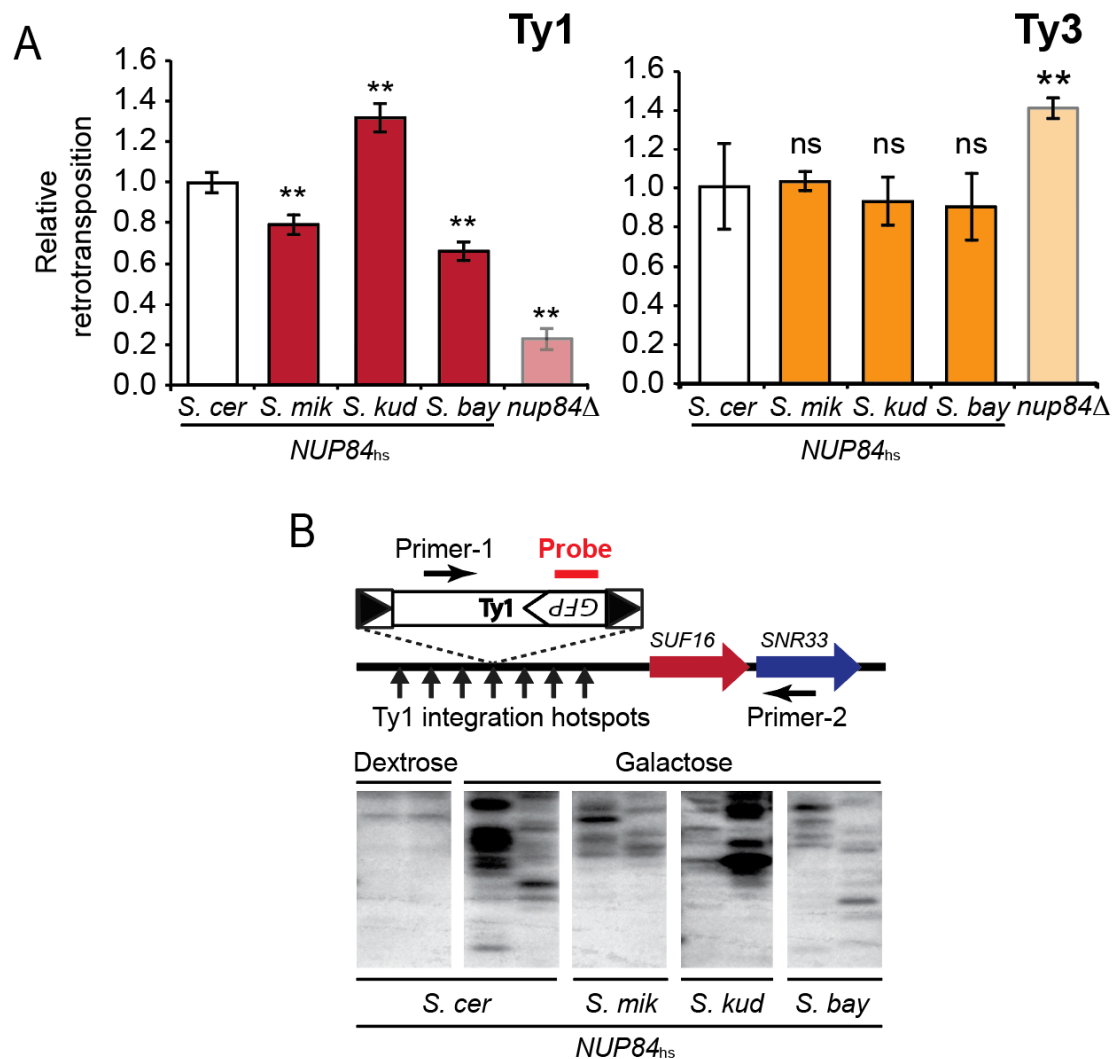

**Figure 5. Evolutionary differences between *NUP84* of different *Saccharomyces* species alter levels of Ty1 retrotransposition.** (A) Relative retrotransposition of Ty1 and Ty3 within *nup84Δ* or *nup84Δ* complemented with heterospecific *NUP84* from different *Saccharomyces* species. Asterisks designate complemented strains that have significantly different levels of retrotransposition compared to the strain encoding *NUP84* from *S. cerevisiae* (Tukey–Kramer method,  $p < 0.05$ ) (error bars: standard error,  $n > 3$ ). (B) Southern blot analysis of Ty1 integration in two independent clones upstream of the *SUF16* locus, which contains Ty1 integration hotspots in its promoter [71]. PCR products across the *SUF16* locus were run on a gel and then probed with a radiolabeled DNA probe specific to *GFP* in order to detect integration events.



These data show that evolutionary differences between *NUP84* of different *Saccharomyces* species modulate the retrotransposition efficiency of Ty1 in a species-specific manner, even though all host functions are conserved. Pairing Ty1 from *S. cerevisiae* with *NUP84* of other species apparently decouples a finely co-evolved relationship, altering levels of retrotransposition. To support this model, we also assayed the impact of *NUP84* evolution on Ty3 replication. We used a galactose inducible Ty3 with a *HIS3* reporter gene and assayed the appearance of colonies able to grow on histidine deficient media as an indication of successful retrotransposition (see methods) [68,72-74]. In contrast to Ty1, we found that *nup84Δ* resulted in increased retrotransposition, as was previously reported [55]. However, each of the heterospecific *NUP84* genes returned transposition to the lower level with no significant difference in retrotransposition among strains encoding heterospecific *NUP84* (one way ANOVA,  $p=0.90$ ) (Figure 5A). Collectively, these data suggest that the co-evolutionary dynamics are specific to *NUP84* and Ty1.

### ***NUP82* has evolved to limit Ty3 retrotransposition.**

Our evolutionary analysis also identified the gene *NUP82* as being the highest scoring nucleoporin in our evolutionary screen (Figure 2B; 2C; S1), however no role for *NUP82* has been reported in Ty biology. This could be because *NUP82* is an essential gene and would have eluded detection in genome-wide knockout screens. To investigate whether *NUP82* is involved in Ty replication, a dominant negative approach was adopted. Full- or partial-length portions of *NUP82* were expressed in cells that are otherwise wild type at the *NUP82* locus. These Nup82p constructs included the



mutations D204A, F290A, Y295A, L393A, I397A, L402A, L405A and F410A (Nup82p<sup>DFY-LILLF</sup>) that inactivate interaction with other nucleoporins and decouple it from the nuclear pore complex [75] (Figure 6A). Nup82p<sup>DFY-LILLF</sup> is non-functional as a nucleoporin, therefore we reasoned that it would compete with wild-type Nup82p and have an inhibitory effect on retrotransposition if Ty interacts with Nup82p to transit the nuclear pore. Indeed, the expression of the C-terminal helical domain of Nup82p (residues 433-713) significantly reduced Ty1 retrotransposition, with the N-terminal  $\beta$ -propeller domain (residues 1-458) being dispensable for this effect (Figure 6B). Expression of any of the dominant negative *NUP82* genes did not noticeably affect the growth of *S. cerevisiae* (Figure 6C) or general nuclear import (Figure 6D) compared to expression of the control gene *MET17*, which suggests that these proteins are not toxic to *S. cerevisiae* and do not disrupt the nuclear pore complex. In summary, this serves as preliminary evidence of a previously uncharacterized role for *NUP82* in Ty1 replication.

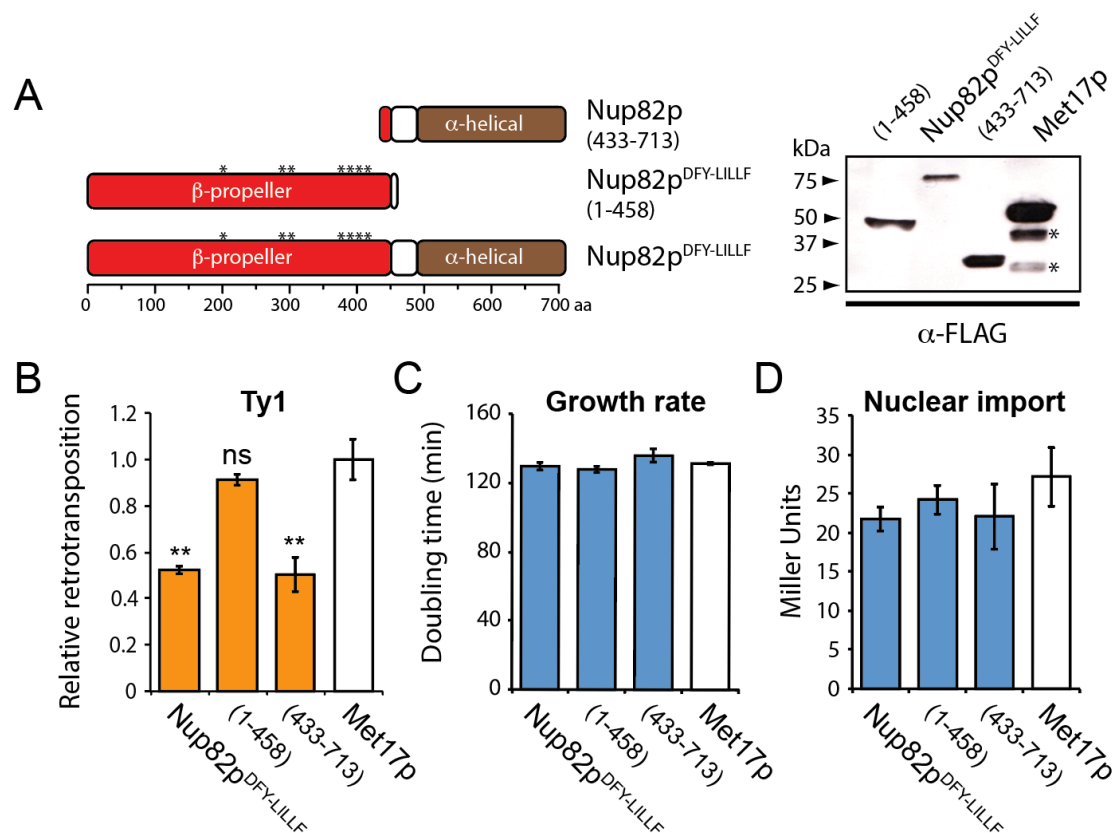

**Figure 6. The expression of dominant negative *NUP82* and its impact on Ty1 retrotransposition.** (A) *Left*. A linear domain diagram of Nup82p<sup>DFY-LILLF</sup> and derived deletion mutants [Nup82p(433-713) and Nup82p<sup>DFY-LILLF</sup> (1-458)]. Asterisks mark the mutations that decouple Nup82p from the nuclear pore complex. *Right*. Western blot analysis to detect the expression of FLAG-tagged Nup82p<sup>DFY-LILLF</sup> and its derivatives, compared to the expression of a control protein (Met17p) in the wild-type background (\*Met17p degradation products). The effect of Nup82p<sup>DFY-LILLF</sup> expression on (B) Ty1 retrotransposition, (C) doubling time in liquid medium and (D) the nuclear import of the reporter protein LexA-MBP-Gal4(AD), relative to the expression of MET17 (error bars: standard error, n>3; \*\*Tukey-Kramer method, p<0.05).

In a similar approach to that taken with *NUP84*, *S. cerevisiae* was engineered to express *NUP82* from different *Saccharomyces* species to ascertain the impact of evolution on Ty retrotransposition. Due to the essential nature of *NUP82*, we used a *NUP82/nup82Δ* heterozygous diploid strain from the “synthetic genetic array” collection [76] as our starting strain for the genomic replacement of *NUP82*<sup>S.cer</sup>. A customized Scel

restriction endonuclease method was used to improve the efficiency of homologous recombination-based gene replacement (see methods) (Figure 7A and S2). *S. cerevisiae* encoding heterospecific *NUP82* have a normal colony morphology, growth rate (Figure 7B), and no difference in *GAL1* and *CUP1* promoter expression (Figure S3), suggesting that the cells are the same in measurable host functions. We tested the effect of *NUP82* evolution on Ty1 retrotransposition using the GFP fluorescence assay and, in contrast to our studies of *NUP84*, found that retrotransposition levels were similar in strains expressing *NUP82*<sup>*S.mik*</sup> and *NUP82*<sup>*S.bay*</sup> and *NUP82*<sup>*S.cer*</sup>, but were significantly higher for strains complemented with *NUP82*<sup>*S.kud*</sup> (Figure 7C). Thus, although *NUP82* may be important for Ty1 retrotransposition (Figure 6), we find that Ty1 seems mostly insensitive to the evolutionary differences between *NUP82* of different species. We next assayed the replication of a Ty3 retrotransposon in the engineered *NUP82* heterospecific strains. *S. cerevisiae* expressing *NUP82*<sup>*S.mik*</sup> resulted in a significant >3-fold increase in Ty3 retrotransposition, relative to *NUP82*<sup>*S.cer*</sup> (Tukey–Kramer method,  $p < 0.05$ ) (Figure 7C). These data show that the evolutionary differences within *Saccharomyces NUP82* can impact both Ty1 and Ty3 retrotransposition, but predominantly Ty3. Together, we show that *NUP82* appears to play a previously uncharacterized role in Ty retrotransposition, and that Ty1 and Ty3 are differentially susceptible to evolutionary changes within *NUP82*.

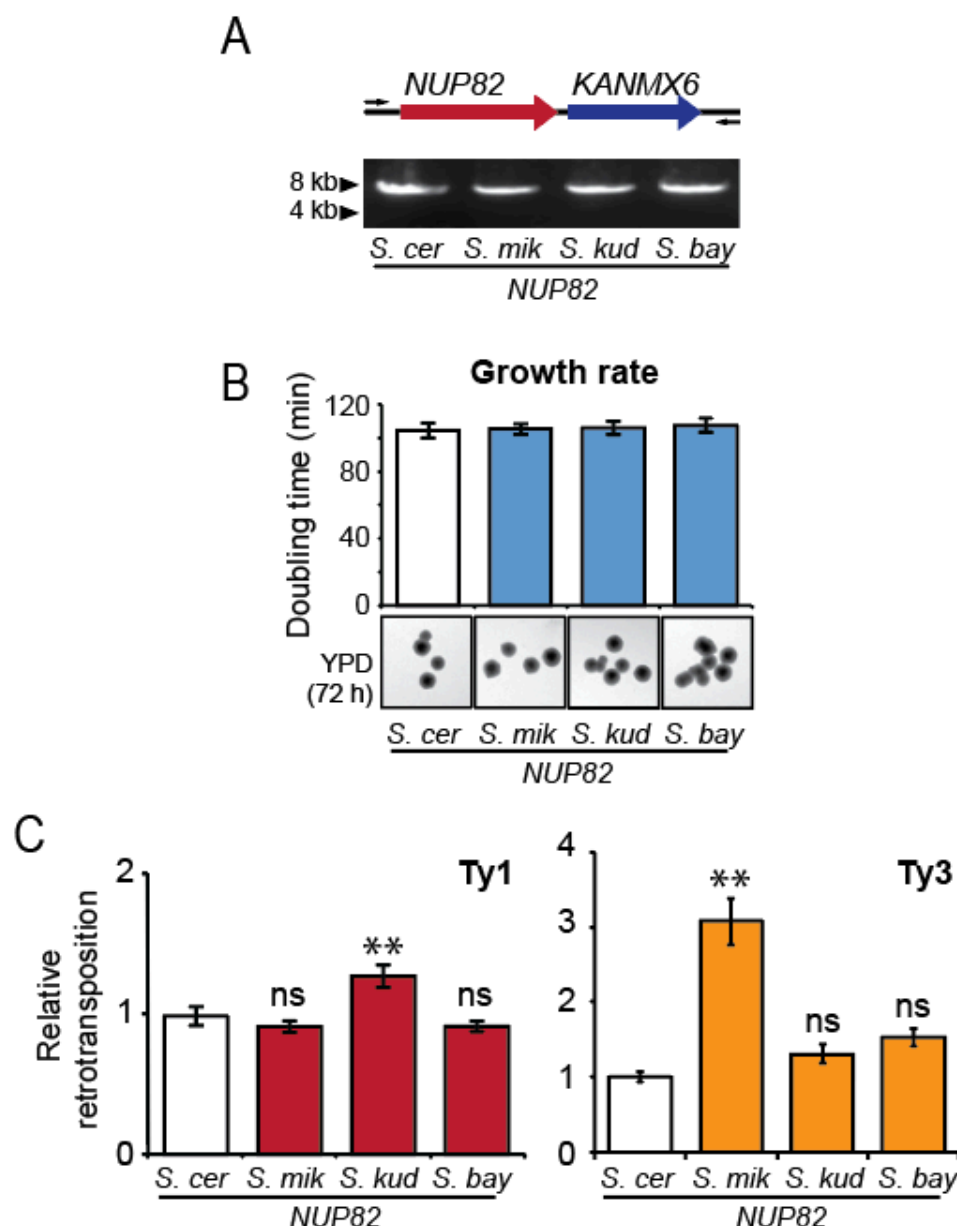

**Figure 7. The evolution of *NUP82* and its effect on Ty1 and Ty3 retrotransposition within *S. cerevisiae*.** (A) A schematic representation of *S. cerevisiae* engineered to express heterospecific *NUP82* (*NUP82*) from different *Saccharomyces* species. Genome engineering was confirmed by PCR amplification across the *NUP82* locus. (B) The doubling time of *NUP82*-complemented strains in liquid medium. Colony growth and morphology of the engineered strains was monitored for 72 h on solid YPD medium (error bars: standard error,  $n > 3$ ). (C) Relative retrotransposition of Ty1 and Ty3 within strains complemented with *NUP82* from different *Saccharomyces* species. Asterisks mark significant differences in retrotransposition compared to the strain encoding

*NUP82* from *S. cerevisiae* (error bars: standard error,  $n > 3$ ; \*\*Tukey–Kramer method,  $p < 0.05$ ).

## DISCUSSION

There are many selective pressures driving the evolution of *Saccharomyces* yeasts, including resource competition, sexual selection, and long-term co-evolution to exist with viruses and other genetic parasites [11,12,77-81]. As Tys are the only known genetic parasites within *Saccharomyces* yeasts that enter the nucleus, this provides a unique opportunity to study their impact on the evolution of the nuclear pore complex. We find signatures of natural selection acting on several nucleoporins, coinciding with previous observations that deletion or disruption of several of these genes alters Ty retrotransposition. Here, we use a unique approach to demonstrate that the evolutionary changes that have accumulated in yeast nucleoporins alter Ty retrotransposition levels. We replaced *NUP82* and *NUP84*, within the context of the *S. cerevisiae* genome, with orthologs from related *Saccharomyces* yeasts, and then measured Ty retrotransposition in these isogenic yeast strains. It is important to note that the genetic parasites have been held constant in the study, with both Ty1 and Ty3 deriving from the *S. cerevisiae* lineage. In some cases, orthologs of *NUP82* and *NUP84* resulted in higher levels of *S. cerevisiae* Ty retrotransposition, and in other cases, they resulted in lower levels. These patterns are consistent with a model where nucleoporins are co-evolved with the Ty of their own species. When a Nup82p or Nup84p ortholog is substituted within the *S. cerevisiae* nuclear pore, sometimes *S. cerevisiae* Ty can exploit it better than it can the *S. cerevisiae* version of that protein (possibly by having an increased affinity for the foreign ortholog, which is not evolved to evade it). Other times, the *S. cerevisiae* Ty is less able to utilize this orthologous protein because the Ty has not evolved refined

interaction with this particular ortholog. Ultimately, our data shows that uncoupling *S. cerevisiae* Ty from the co-evolved *S. cerevisiae* *NUP82* or *NUP84* results in altered levels of retrotransposition. The replacement of *S. cerevisiae* nucleoporins with heterospecific nucleoporins “decouples” this evolutionarily optimized interaction and leads to either an increase or decrease in retrotransposition, without impacting cellular homeostasis (e.g. nuclear import). While it is never possible to know for sure what has driven selection within these genes, nucleoporins from different *Saccharomyces* species support variable levels of Ty1 or Ty3 retrotransposition, providing a phenotypic trait on which selection may have been acting. This is similar to our recent observations that the antiviral *XRN1* gene from *Saccharomyces* yeasts has likely co-evolved with totiviruses to control excessive viral replication [11].

The exact functions of *NUP82* and *NUP84* during Ty retrotransposition, and their mechanism of action, remain unclear. Ty nuclear ingress likely involves docking of the virus-like particle to the nuclear periphery by interaction with nucleoporins [25,41]. The known positioning of Nup82p and Nup84p at the cytoplasmic face of the nuclear pore complex could possibly facilitate virus-like particle docking, in a similar manner to their recruitment and binding of host karyopherins prior to nuclear import [82-85]. Multiple Ty3 proteins (Gag3, p27 and CA) interact directly with nucleoporins, and the integrase of Ty1 and Ty3 contain nuclear localization signals [25,42-45]. Therefore, it seems likely that Ty proteins interact directly with nucleoporins, and that evolutionary selection could be acting to alter these physical interactions. That fragments of Nup82p inhibit retrotransposition is consistent with this. Because these fragments aren’t incorporated into the nuclear pore, they are likely acting through dominant negative physical interactions with Ty.

The evolutionary relationship between yeast and Ty retrotransposons is complex. The intracellular lifecycle and ubiquity of Ty would suggest that Ty have been co-evolving with the *Saccharomyces* genus for many millions of years [1,2]. Evolutionary selection would favor limited Ty replication, as active retrotransposition and high Ty copy number can alter yeast fitness [3-6,10]. Indeed, certain families of Tys are absent from certain strains and species of *Saccharomyces* yeasts [1,64,86,87]. However, the persistence of Tys in *Saccharomyces* yeasts suggests that loss of Tys is rare, perhaps due to Ty introgression and transmission by sexual reproduction, which are potential mechanisms by which Tys can invade Ty-free or naive populations [1,86,88]. Also, the error prone nature of the Ty reverse transcriptase and reverse transcription-mediated recombination can generate Ty variants that could also overcome host-encoded resistance mechanisms [89]. In contrast to the idea that Tys are completely parasitic, Ty retrotransposition can drive the evolution of the yeast genome by changing gene regulation and expression by integrating in or near host genes. Tys can also facilitate gross chromosomal rearrangements of the host genome, including translocations and deletions, by way of homologous recombination between Ty integrated at different locations within host chromosomes [90-93]. Experimental systems have shown that Ty-mediated genome evolution can be observed in the laboratory [4], and would likely allow populations of *Saccharomyces* yeasts to rapidly respond to selective pressures found within the natural environment. Thus, in the context of the nuclear pore complex, there may be evolutionary selection to prevent Ty nuclear transit and excessive replication, but also selection against mutations that completely abrogate retrotransposition. The long-term association between *S. cerevisiae* and its cognate Tys would imply that this interaction has been “optimized” by evolutionary selection, perhaps to balance the

damaging effects of excessive Ty retrotransposition with the benefits of genome plasticity.

The nuclear pore is the gatekeeper of the nucleus, and it is antagonized by many pathogens and genetic parasites. The nucleoporins that are under positive selection in yeast have also been shown to be essential to the replication of other retrotransposons and viruses. The fission yeast *Schizosaccharomyces pombe* ortholog of *NUP1* (*NUP124*) is required for retrotransposition of the Ty3/gypsy-like element Tf1 and directly interacts with the Tf1-encoded Gag protein [94,95]. The human homologs of *NUP1* and *NUP116* (*NUP153* and *NUP98*, respectively) are important for viral replication in humans, including for HIV, HBV, HCV, and influenza virus [24,29,33,96-101]. Specifically, *NUP153* is an important determinant of HIV and HBV nuclear import, and its FG (phenylalanine-glycine)-repeat domain directly interacts with HIV capsid, via specific FG-repeats [24,33,102,103]. In *S. cerevisiae*, the FG-repeat region of Nup116p directly interacts *in vitro* with the Ty3-encoded protein Gag3, and truncation of *NUP116* decreases retrotransposition [25]. In human cells, the reduced expression of *NUP88* and *NUP107* (orthologs of yeast *NUP82* and *NUP84*, respectively) reduces HIV and influenza virus replication [97,104], however, it is unclear whether their role in viral nuclear import is direct or a consequence of pleiotropic effects (e.g. disruption of the nuclear pore complex). Collectively, this paints a picture of complex evolutionary pressures on nuclear pore genes across eukaryotes.

It appears that viral infections have broadly shaped the evolution of host genomes, affecting genes well beyond immunity loci [105]. The most classic example involves cellular entry receptors used by viruses to enter cells. These receptors are



often under positive selection, resulting in highly species-specific interactions with viruses [106-110]. The nuclear pore complex is the gatekeeper of the nucleus just like cell surface receptors are gatekeepers of the cytoplasm. Our work in *Saccharomyces* yeasts provides a framework to further investigate the importance of the nuclear pore complex in modulating Ty retrotransposition, and for a parallel investigation into the evolution of the orthologous nuclear pore complex of higher eukaryotes. It remains unknown how broadly viruses and genetic parasites are driving the evolution of important housekeeping proteins, but intriguing recent reports involving genes such as *XRN1* (involved in degradation of uncapped mRNAs; [11]), and DNA repair genes [111], suggest that this might be more common than previously appreciated.

## Materials and Methods

### *Plasmid construction*

The *ACT1* intron (*ACT1i*) and an artificial intron (*AI*) [112] were amplified by PCR with included primer-encoded flanking homology to *GFP*. This PCR product was inserted directly after the ATG start codon at the 5' end of *GFP* by the “yeast plasmid construction by homologous recombination” method (recombineering) [113]. *GFP(AI)* and *GFP(ACT1i)* were amplified by PCR and introduced into pAG423-GAL-*ccdB* using TOPO-TA and Gateway cloning strategies (Thermo Fisher) to create pPAR061 and pPAR063, respectively. *GFP(ACT1i)* was also placed under the control of the *CUP1* inducible promoter (456 bp upstream of *CUP1* were cloned directly from the genome of *S. cerevisiae*) using recombineering. pCUP1-*GFP(ACT1i)* was used to replace *HIS3(AI)* within pGTy1-*HIS3(AI)* to create pPAR078. pPAR101, pPAR104, pPAR145 and pPAR181 were constructed by using PCR to create DNA encoding FLAG-tagged Nup82p<sup>DFY-LILLF</sup> (1-458), Nup82p<sup>DFY-LILLF</sup> and Nup82p (433-713) from pNOP-GFP-

Nup82p<sup>DFY-LILLF</sup> [75]. *MET17* was amplified directly from the genome of *S. cerevisiae*. All PCR fragments were subsequently cloned into pAG414-GPD-ccdB via pCR8 using TOPO-TA and Gateway cloning strategies (Thermo Fisher). To assay nuclear import using the strategy outlined by Marshall *et al.* we first subcloned the LexA-MBP-GAL4(AD) cassette from pJMB1076n [69] into the pAG413 plasmid backbone using recombineering, essentially changing the selective marker on the plasmid from *LEU2* to *HIS3*. For gene knockout, all plasmids were constructed by recombineering using *NUP82* and *NUP84* amplified from various *Saccharomyces* species. These nucleoporin genes were placed upstream of a selectable marker (*LEU2* or *KANMX6*) and the entire cassette flanked by 1000 bp of sequence encompassing the 5' and 3' untranslated regions of *NUP82* or *NUP84* from *S. cerevisiae*. pPAR240 was constructed by first amplifying a LexA operator sequence upstream of the  $\beta$ -galactosidase gene from *S. cerevisiae* L40. PCR products were designed to contain flanking homology to *ADE2* from *S. cerevisiae* and these PCR products were used to disrupt the *ADE2* gene within pRS422 to create pPAR240.

### ***Evolutionary analysis***

Gene sequences from six species of *Saccharomyces* yeasts were obtained from publically available online resources. Maximum likelihood analysis of dN/dS was performed using the codeml program in PAML 4.1. Multiple protein sequence alignments were created and were manually curated to remove ambiguities before processing with PAL2NAL to produce accurate DNA alignments [114]. DNA alignments were fit to two models: M7 (codons fit to a beta distribution of dN/dS values, with dN/dS > 1 disallowed) and M8 (similar to model 7, but with dN/dS > 1 allowed). Two models of codon frequencies (f61 and f3x4) and multiple seed values for dN/dS ( $\omega$ ) were used (File S1).

Likelihood ratio tests were performed to evaluate which model of evolution the data fit significantly better with positive selection and inferred if we can reject M7 in favor of M8 with a  $p < 0.05$ . REL and FEL codon based models were also used to detect sites under positive selection as implemented by the HyPhy package using the best substitution models chosen by Akaike information criterion (AIC) using the phylogenetic tree (Newick format):

((((*S. paradoxus*, *S. cerevisiae*), *S. mikatae*), *S. kudriavzevii*), *S. arboricolus*, *S. bayanus*).

### **Strain Construction**

Standard methodologies for PCR-based gene knockout and replacement were used to create all *NUP84* strains in BY4741 (YPAR0130-0133) [115]. Strains YPAR0135-0138 were engineered to encode a LexA operator sequence upstream of the  $\beta$ -galactosidase gene, and were constructed by the disruption of the genomic copy of *ADE2* using a PCR cassette amplified from pPAR240. Clones selected for their ability to grow on media lacking uracil and inability to grown on media lacking adenine. *NUP82* gene replacement utilized a Scel-based method to increase the efficiency of the integration of *NUP82* and *KANMX6* by generating DNA double-stranded breaks at the *NUP82* locus in *S. cerevisiae* (personal communication, Dr. C.M. Yellman). Using a diploid heterozygous knockout strain of *NUP82* [76], *KANMX6* at the *NUP82* locus was replaced with the *URA3* gene from *K. lactis* flanked by Scel sites amplified by PCR from pCMY-IT3. Gene replacement was carried out by the concomitant expression of Scel from pGAL1-SCEH and the LiAc transformation of a PCR-derived cassette encoding *NUP82-KANMX6*. *NUP82/nup82 $\Delta$ ::NUP82-KANMX6* clones were selected by their ability to grow in the presence of 400  $\mu\text{g mL}^{-1}$  G418 and their resistance to 5-FOA (0.1%

w/v). Haploid clones were isolated from the engineered diploid strains using the SGA selection protocol as described previously [76]. The correct insertions were confirmed by PCR of genomic DNA of the *NUP82* locus to create strains YPAR0139, YPAR0143, YPAR0141 and YPAR0142. A PCR cassette was used to disrupt *HIS3* in YPAR0139, YPAR0143, YPAR0141 and YPAR0142, clones were selected for their ability to grow on media containing hygromycin and inability to grow on media lacking histidine to produce strains YPAR0143, YPAR0145, YPAR0147 and YPAR0149.

### ***Splicing of the ACT1 intron and insertion of an artificial intron within the GFP gene***

Plasmids pPAR063 and pPAR061 were used to produce *GFP* transcripts containing either the *ACT1* intron (*ACT1i*) or an artificial intron (*AI*) [112], respectively, by induction from a galactose inducible promoter. Cultures were grown to mid-log phase in liquid culture with raffinose as the sole carbon source. At OD<sub>600</sub> of ~1 galactose or dextrose were added to a final concentration of 2% and the cultures grow at 30°C for 2 h. Total RNA was extracted from these cultures (~2 x 10<sup>7</sup> cells) using the RNeasy RNA extraction kit (Qiagen). 5 µg of RNA was treated with 1 U of DNase I at 37°C for 10 min before heat inactivation at 75°C for 10 min. RNA samples were then subject to two-step RT-PCR using the Superscript III one-step method using the *GFP*-specific primers 5'-AAGCTGACCCTGAAGTTCATCTGC-3' and 5'-CGTTGTGGCTGTTGTAGTTGTACTCC-3'.

### ***Ty1 retrotransposition assays***

Yeast strains to be assayed for their ability to support Ty1 retrotransposition were transformed with either pPAR078 (*GFP* flow cytometry method) or pGTy1(*HIS3*(*AI*)) (as previously described in [71]). To detect retrotransposition using *GFP* positive cells, single colonies from *S. cerevisiae* transformed with pPAR078 were isolated for each new

experiment. Each experiment was performed at least three times. Colonies were first grown for 24 h in 2 mL raffinose -uracil complete medium at 30°C with agitation.  $1 \times 10^5$  cells from the saturated cultures were used to inoculate 15 mL of complete medium with galactose -uracil, followed by growth for 5 days at room temperature with agitation. Cultures were diluted and allowed to reach early log phase growth ( $OD_{600} \sim 0.05$ ) before the addition of  $CuSO_4$  to a final concentration of 0.5 mM. Cultures were grown for 9 h at 30°C before assaying for the presence of live, GFP positive cells using a BD LSRII Fortessa flow cytometer (San Jose, CA) running FACSDiva software (v6.1.3). GFP excitation was observed with a blue, 488nm laser, while GFP emission was collected using 530/30nm band pass filter and 502nm long pass filter. Propidium iodide (PI) excitation was observed with a yellow-green, 561nm laser, while PI emission was collected using 660/20nm band pass filter and a 635nm long pass filter. 100,000 gated events were collected using a forward scatter vs. side scatter dot plot, with forward scatter showing relative particle size and side scatter showing internal complexity. All subsequent plots were generated from this gated population. Live cells were gated by staining cell populations with PI (final concentration  $0.1 \mu g mL^{-1}$ ) and GFP positive populations were gated by comparison with GFP negative populations of cells. Analysis of flow cytometry data was performed using FlowJo version 9.7.6.

### ***Ty3 transposition assay***

For quantification of Ty3 transposition, yeast cells were transformed with pPS3858, a *URA3* marked galactose inducible Ty3-HIS3 [68,72-74]. The *HIS3* gene is located at the end of *POL* and is anti-sense to Ty3, except for an artificial intron which is sense. The sense intron prevents production of His3p until after the full-length Ty3 RNA is transcribed, spliced, reverse transcribed and integrated into the genome. Colony transformants were selected on synthetic media with 2% glucose (SD) complete with

amino acids but lacking uracil. Single colonies were inoculated into 2 mL of synthetic raffinose (–uracil) and grown for 24 h. Cultures were then brought to 5 mL and grown for ~8 h, after which OD<sub>600</sub> was measured and cultures were diluted back to an OD<sub>600</sub> of ~0.02 in 4.5 mL and grown overnight. The following morning, 500 µL of 20% galactose (2% final) was added to induce Ty3 expression; after 8 h of induction cultures were pelleted, washed in SD media, serially diluted, and plated on both SD plates lacking histidine for growth of transposed cells and also YPD plates to determine total live cell counts.

### **Nup82p<sup>DFY-LILLF</sup> expression assays**

Plasmids constitutively expressing either Nup82p<sup>DFY-LILLF</sup>, Nup82p truncation mutants or Met17p were introduced into a strain containing a Ty1 retrotransposition reporter plasmid. Retrotransposition assays were carried out as previously described above, but with the use of double-dropout complete medium to maintain both episomal vectors during retrotransposition.

### **Western blotting of Nup82p<sup>DFY-LILLF</sup> and truncation mutants**

Yeast lysates were prepared from 5 mL of stationary phase culture grown for 16 h in yeast complete medium -leucine -tryptophan. Cell pellets were washed with 1 mL of chilled 25 mM Tris-HCl (pH 7.0), 10 mM sodium azide before incubation at 100°C for 3 min. 50 µL of SDS sample loading buffer (100 mM Tris-HCl, 5% SDS, 10% glycerol, 0.1% bromophenol blue, 2% β-mercaptoethanol, pH 6.8) was added to the boiled pellet with 200 µL of acid-washed glass beads (0.5 mm). Samples were vortexed for 10 min to disrupt yeast cells before the addition of another 80 µL of SDS sample loading buffer. Glass beads were pelleted by centrifugation (1500 × g, 2 min). 30 µL of each sample

was loaded directly onto a precast Tris-glycine 10% SDS-PAGE gel (Biorad). Flag-tagged *NUP82* mutants were detected via Western blot using a 1:4000 dilution of a primary mouse monoclonal anti-flag (Syd Labs #M20008). Secondary detection was carried out using a 1:2000 dilution of a goat anti-mouse horseradish peroxidase conjugated antibody (Thermo #32430).

### ***Nuclear pore complex import assays***

A LexA-MBP-GAL4(AD) fusion protein with or without an SV40 nuclear localization signal [69] was used to measure the efficiency of nuclear import within *S. cerevisiae* L40 or BY4741. 5 mL of glucose supplemented synthetic complete medium lacking the appropriate amino acid and grown overnight at 30°C with agitation. Cells were collected by centrifugation at 4000 × g for 30 seconds and the cell pellets suspended in 750 µL of ice-cold ddH<sub>2</sub>O. Washed cells were again collected by centrifugation (13,000 × g for 30 seconds), and soluble proteins extracted by Y-PER buffer as per manufacturer's instructions (Thermo). The lysate was assayed for β-galactosidase activity as described previously [116].

### ***Fluorescence microscopy***

The steady-state import of GFP-NLS was monitored within BY4741 transformed with pEB0836 as described previously [70].

### ***Detection of Ty1 genomic integrations by Southern blotting***

The detection of the integration of Ty1 containing *GFP* by Southern blotting was performed as previously described [71], in the various *NUP84*-complemented or deletion strains of *S. cerevisiae*. Total DNA was extracted from cell cultures using

phenol:chloroform and ethanol precipitation, after 5 days of retrotransposition induction, as described in the Ty1 retrotransposition assay protocol above. Southern blotting was carried out after agarose gel electrophoresis, as described previously [117], using Hybond-XL membranes (GE healthcare).

### **Promoter activity assay**

To assay the activity of the *GAL1* promoter we expressed *GFP* under the control of the *GAL1* promoter and monitored the increase in the mean fluorescent intensity (MFI) compared to uninduced control cells. Cells were grown overnight to saturation at 30°C (CM -uracil, 2% raffinose) before being used to seed a 10 mL culture that was grown to log phase (OD<sub>600</sub> 0.1-0.5). Each 10 mL log phase culture was divided into two 5 mL cultures, supplemented with either 2% galactose or dextrose (final concentration) and grown for 6 h. Cultures were assayed for GFP fluorescence by flow cytometry using the same instrumentation as described above. The activity of the *CUP1* promoter was assayed by analyzing MFI data derived from Ty1-GFP retrotransposition assays.

### **Acknowledgments**

The authors would like to thank Emily Feldman, David Garfinkel, Chien Hui-Ma, André Hoelz, Makkuni Jayaram, Aashiq Kachroo, Maryska Kaczmarek, Nicholas Meyerson, Joe Mymryk, Soumitra Sau, Matthew Sorenson, Alex Stabell, Scott Stevens, Cody Warren, Suzanne Wente, Chris Yellman and Renate van Zandwijk for critical reagents, laboratory support, and insightful discussions. This work was supported by a grant from the National Institutes of Health (GM093086 to S.L.S.). S.L.S. is a Burroughs Wellcome Fund Investigator in the Pathogenesis of Infectious Disease.



## References

1. Liti G, Peruffo A, James SA, Roberts IN, Louis EJ. Inferences of evolutionary relationships from a population survey of LTR-retrotransposons and telomeric-associated sequences in the *Saccharomyces sensu stricto* complex. *Yeast*. 2005;22: 177–192. doi:10.1002/yea.1200
2. Dujon B. Yeasts illustrate the molecular mechanisms of eukaryotic genome evolution. *Trends Genet*. 2006;22: 375–387. doi:10.1016/j.tig.2006.05.007
3. Garfinkel DJ. Genome evolution mediated by Ty elements in *Saccharomyces*. *Cytogenet Genome Res*. 2005;110: 63–69. doi:10.1159/000084939
4. Gresham D, Desai MM, Tucker CM, Jenq HT, Pai DA, Ward A, et al. The repertoire and dynamics of evolutionary adaptations to controlled nutrient-limited environments in yeast. *PLoS Genet*. 2008;4: e1000303. doi:10.1371/journal.pgen.1000303
5. Scheifele LZ, Cost GJ, Zupancic ML, Caputo EM, Boeke JD. Retrotransposon overdose and genome integrity. *Proc Natl Acad Sci U S A. National Acad Sciences*; 2009;106: 13927–13932. doi:10.1073/pnas.0906552106
6. Wilke CM, Adams J. Fitness effects of Ty transposition in *Saccharomyces cerevisiae*. *Genetics*. 1992;131: 31–42.
7. Nishida Y, Pachulska-Wieczorek K, Błaszczyk L, Saha A, Gumna J, Garfinkel DJ, et al. Ty1 retrovirus-like element Gag contains overlapping restriction factor and nucleic acid chaperone functions. *Nucleic Acids Res*. 2015;43: 7414–7431. doi:10.1093/nar/gkv695
8. Matsuda E, Garfinkel DJ. Posttranslational interference of Ty1 retrotransposition by antisense RNAs. *Proc Natl Acad Sci U S A*. 2009;106: 15657–15662. doi:10.1073/pnas.0908305106
9. Saha A, Mitchell JA, Nishida Y, Hildreth JE, Ariberre JA, Gilbert WV, et al. A trans-Dominant Form of Gag Restricts Ty1 Retrotransposition and Mediates Copy Number Control. Sundquist WI, editor. *J Virol*. 2015;89: 3922–3938. doi:10.1128/JVI.03060-14
10. Feng G, Leem YE, Levin HL. Transposon integration enhances expression of stress response genes. *Nucleic Acids Res*. 2013;41: 775–789. doi:10.1093/nar/gks1185
11. Rowley PA, Ho B, Bushong S, Johnson A, Sawyer SL. *XRN1* Is a Species-Specific Virus Restriction Factor in Yeasts. *PLoS Pathog*. 2016;12: e1005890. doi:10.1371/journal.ppat.1005890
12. Sawyer SL, Malik HS. Positive selection of yeast nonhomologous end-joining genes and a retrotransposon conflict hypothesis. *Proc Natl Acad Sci U S A*. 2006;103: 17614–17619. doi:10.1073/pnas.0605468103

13. Cohen S, Au S, Panté N. How viruses access the nucleus. *Biochim Biophys Acta*. 2011;1813: 1634–1645. doi:10.1016/j.bbamcr.2010.12.009
14. Whittaker G. Virus nuclear import. *Adv Drug Deliv Rev*. 2003;55: 733–747. doi:10.1016/S0169-409X(03)00051-6
15. Mettenleiter TC. Breaching the Barrier—The Nuclear Envelope in Virus Infection. *J Mol Biol*. Elsevier Ltd; 2016;428: 1949–1961. doi:10.1016/j.jmb.2015.10.001
16. Neumann N, Lundin D, Poole AM. Comparative genomic evidence for a complete nuclear pore complex in the last eukaryotic common ancestor. *PLoS ONE*. 2010;5: e13241. doi:10.1371/journal.pone.0013241
17. Tamura K, Fukao Y, Iwamoto M, Haraguchi T, Hara-Nishimura I. Identification and characterization of nuclear pore complex components in *Arabidopsis thaliana*. *Plant Cell*. American Society of Plant Biologists; 2010;22: 4084–4097. doi:10.1105/tpc.110.079947
18. DeGrasse JA, DuBois KN, Devos D, Siegel TN, Sali A, Field MC, et al. Evidence for a shared nuclear pore complex architecture that is conserved from the last common eukaryotic ancestor. *Mol Cell Proteomics*. 2009;8: 2119–2130. doi:10.1074/mcp.M900038-MCP200
19. Rout MP, Aitchison JD, Suprpto A, Hjertaas K, Zhao Y, Chait BT. The yeast nuclear pore complex: composition, architecture, and transport mechanism. *J Cell Biol*. 2000;148: 635–651.
20. Aitchison JD, Rout MP. The Yeast Nuclear Pore Complex and Transport Through It. *Genetics*. 2012;190: 855–883. doi:10.1534/genetics.111.127803
21. Lin DH, Stuwe T, Schilbach S, Rundlet EJ, Perriches T, Mobbs G, et al. Architecture of the symmetric core of the nuclear pore. *Science*. 2016;352: aaf1015–aaf1015. doi:10.1126/science.aaf1015
22. Alber F, Dokudovskaya S, Veenhoff LM, Zhang W, Kipper J, Devos D, et al. The molecular architecture of the nuclear pore complex. *Nature*. 2007;450: 695–701. doi:10.1038/nature06405
23. Wentz SR, Rout MP. The nuclear pore complex and nuclear transport. *Cold Spring Harb Perspect Biol*. 2010;2: a000562. doi:10.1101/cshperspect.a000562
24. Matreyek KA, Yucel SS, Li X, Engelman A. Nucleoporin NUP153 Phenylalanine-Glycine Motifs Engage a Common Binding Pocket within the HIV-1 Capsid Protein to Mediate Lentiviral Infectivity. Luban J, editor. *PLoS Pathog*. 2013;9: e1003693. doi:10.1371/journal.ppat.1003693
25. Beliakova-Bethell N, Terry LJ, Bilanchone V, DaSilva R, Nagashima K, Wentz SR, et al. Ty3 nuclear entry is initiated by viruslike particle docking on GLFG nucleoporins. *J Virol*. 2009;83: 11914–11925. doi:10.1128/JVI.01192-09
26. Schaller T, Ocwieja KE, Rasaiyaah J, Price AJ, Brady TL, Roth SL, et al. HIV-1

- capsid-cyclophilin interactions determine nuclear import pathway, integration targeting and replication efficiency. Aiken C, editor. PLoS Pathog. 2011;7: e1002439. doi:10.1371/journal.ppat.1002439.g007
27. Bauer DW, Huffman JB, Homa FL, Evilevitch A. Herpes Virus Genome, The Pressure Is On. J Am Chem Soc. 2013;135: 11216–11221. doi:10.1021/ja404008r
28. Strunze S, Engelke MF, Wang I-H, Puntener D, Boucke K, Schleich S, et al. Kinesin-1-Mediated Capsid Disassembly and Disruption of the Nuclear Pore Complex Promote Virus Infection. Cell Host Microbe. Elsevier Inc; 2011;10: 210–223. doi:10.1016/j.chom.2011.08.010
29. Schmitz A, Schwarz A, Foss M, Zhou L, Rabe B, Hoellenriegel J, et al. Nucleoporin 153 Arrests the Nuclear Import of Hepatitis B Virus Capsids in the Nuclear Basket. Taylor J, editor. PLoS Pathog. 2010;6: e1000741–15. doi:10.1371/journal.ppat.1000741
30. Fitzgerald KD, Semler BL. Re-localization of Cellular Protein SRp20 during Poliovirus Infection: Bridging a Viral IRES to the Host Cell Translation Apparatus. Racaniello V, editor. PLoS Pathog. 2011;7: e1002127–19. doi:10.1371/journal.ppat.1002127
31. Matreyek K, Engelman A. Viral and Cellular Requirements for the Nuclear Entry of Retroviral Preintegration Nucleoprotein Complexes. Viruses. Multidisciplinary Digital Publishing Institute; 2013;5: 2483–2511. doi:10.3390/v5102483
32. Bichel K, Price AJ, Schaller T, Towers GJ, Freund SMV, James LC. HIV-1 capsid undergoes coupled binding and isomerization by the nuclear pore protein NUP358. Retrovirology. 2013;10: 81. doi:10.1186/1742-4690-10-81
33. Di Nunzio F, Fricke T, Miccio A, Valle-Casuso JC, Perez P, Souque P, et al. Nup153 and Nup98 bind the HIV-1 core and contribute to the early steps of HIV-1 replication. Virology. Elsevier; 2013;440: 8–18. doi:10.1016/j.virol.2013.02.008
34. Wickner RB, Fujimura T, Esteban R. Viruses and prions of *Saccharomyces cerevisiae*. Adv Virus Res. Elsevier; 2013;86: 1–36. doi:10.1016/B978-0-12-394315-6.00001-5
35. Rowley PA. The frenemies within: viruses, retrotransposons and plasmids that naturally infect *Saccharomyces* yeasts. Yeast. 2017;49: 111. doi:10.1002/yea.3234
36. Beauregard A, Curcio MJ, Belfort M. The take and give between retrotransposable elements and their hosts. Annu Rev Genet. 2008;42: 587–617. doi:10.1146/annurev.genet.42.110807.091549
37. Patterson K, Sandmeyer S, Bilanchone V. Ty3, a Position-specific Retrotransposon in Budding Yeast. Microbiol Spectr. 2015;3: 1–29. doi:10.1128/microbiolspec.MDNA3-0057-2014

38. Curcio MJ, Lutz S, Lesage P. The Ty1 LTR-Retrotransposon of Budding Yeast, *Saccharomyces cerevisiae*. Microbiol Spectr. 2015;3: 1–35. doi:10.1128/microbiolspec.MDNA3-0053-2014
39. Bilanchone V, Clemens K, Kaake R, Dawson AR, Matheos D, Nagashima K, et al. Ty3 Retrotransposon Hijacks Mating Yeast RNA Processing Bodies to Infect New Genomes. Hopper A, editor. PLoS Genet. 2015;11: e1005528–29. doi:10.1371/journal.pgen.1005528
40. Checkley MA, Mitchell JA, Eizenstat LD, Lockett SJ, Garfinkel DJ. Ty1 Gag Enhances the Stability and Nuclear Export of Ty1 mRNA. Traffic. 2012;14: 57–69. doi:10.1111/tra.12013
41. Hansen LJ, Chalker DL, Orlinsky KJ, Sandmeyer SB. Ty3 GAG3 and *POL3* genes encode the components of intracellular particles. J Virol. American Society for Microbiology (ASM); 1992;66: 1414–1424.
42. Moore SP, Rinckel LA, Garfinkel DJ. A Ty1 integrase nuclear localization signal required for retrotransposition. Mol Cell Biol. 1998;18: 1105–1114.
43. Kenna MA, Brachmann CB, Devine SE, Boeke JD. Invading the yeast nucleus: a nuclear localization signal at the C terminus of Ty1 integrase is required for transposition in vivo. Mol Cell Biol. 1998;18: 1115–1124.
44. Lin SS, Nymark-McMahon MH, Yieh L, Sandmeyer SB. Integrase Mediates Nuclear Localization of Ty3. Mol Cell Biol. American Society for Microbiology; 2001;21: 7826–7838. doi:10.1128/MCB.21.22.7826-7838.2001
45. McLane LM, Pulliam KF, Devine SE, Corbett AH. The Ty1 integrase protein can exploit the classical nuclear protein import machinery for entry into the nucleus. Nucleic Acids Res. 2008;36: 4317–4326. doi:10.1093/nar/gkn383
46. Bridier-Nahmias A, Tchalikian-Cosson A, Baller JA, Menouni R, Fayol H, Flores A, et al. Retrotransposons. An RNA polymerase III subunit determines sites of retrotransposon integration. Science. 2015;348: 585–588. doi:10.1126/science.1259114
47. Kirchner J, Connolly CM, Sandmeyer SB. Requirement of RNA polymerase III transcription factors for in vitro position-specific integration of a retroviruslike element. Science. 1995;267: 1488–1491.
48. Sironi M, Cagliani R, Forni D, Clerici M. Evolutionary insights into host–pathogen interactions from mammalian sequence data. Nat Rev Genet. Nature Publishing Group; 2015;16: 224–236. doi:10.1038/nrg3905
49. Duggal NK, Emerman M. Evolutionary conflicts between viruses and restriction factors shape immunity. Nat Rev Immunol. 2012;12: 687–695. doi:10.1038/nri3295
50. Meyerson NR, Sawyer SL. Two-stepping through time: mammals and viruses. Trends Microbiol. 2011;19: 286–294. doi:10.1016/j.tim.2011.03.006

51. Dakshinamurthy A, Nyswaner KM, Farabaugh PJ, Garfinkel DJ. *BUD22* affects Ty1 retrotransposition and ribosome biogenesis in *Saccharomyces cerevisiae*. *Genetics*. 2010;185: 1193–1205. doi:10.1534/genetics.110.119115
52. Griffith JL, Coleman LE, Raymond AS, Goodson SG, Pittard WS, Tsui C, et al. Functional genomics reveals relationships between the retrovirus-like Ty1 element and its host *Saccharomyces cerevisiae*. *Genetics*. 2003;164: 867–879.
53. Scholes DT, Banerjee M, Bowen B, Curcio MJ. Multiple regulators of Ty1 transposition in *Saccharomyces cerevisiae* have conserved roles in genome maintenance. *Genetics*. Genetics Society of America; 2001;159: 1449–1465.
54. Nyswaner KM, Checkley MA, Yi M, Stephens RM, Garfinkel DJ. Chromatin-associated genes protect the yeast genome from Ty1 insertional mutagenesis. *Genetics*. 2008;178: 197–214. doi:10.1534/genetics.107.082602
55. Irwin B, Aye M, Baldi P, Beliakova-Bethell N, Cheng H, Dou Y, et al. Retroviruses and yeast retrotransposons use overlapping sets of host genes. *Genome Res*. 2005;15: 641–654. doi:10.1101/gr.3739005
56. Aye M, Irwin B, Beliakova-Bethell N, Chen E, Garrus J, Sandmeyer S. Host factors that affect Ty3 retrotransposition in *Saccharomyces cerevisiae*. *Genetics*. 2004;168: 1159–1176. doi:10.1534/genetics.104.028126
57. Maxwell PH, Curcio MJ. Host Factors That Control Long Terminal Repeat Retrotransposons in *Saccharomyces cerevisiae*: Implications for Regulation of Mammalian Retroviruses. *Eukaryotic Cell*. 2007;6: 1069–1080. doi:10.1128/EC.00092-07
58. Fischer J, Teimer R, Amlacher S, Kunze R, Hurt E. Linker Nups connect the nuclear pore complex inner ring with the outer ring and transport channel. *Nat Struct Mol Biol*. 2015;22: 774–781. doi:10.1038/nsmb.3084
59. Stuwe T, Bley CJ, Thierbach K, Petrovic S, Schilbach S, Mayo DJ, et al. Architecture of the fungal nuclear pore inner ring complex. *Science*. 2015;350: 56–64. doi:10.1126/science.aac9176
60. Hurst LD. The Ka/Ks ratio: diagnosing the form of sequence evolution. *Trends Genet*. 2002;18: 486.
61. Yang Z. Adaptive molecular evolution. Balding DJ, Bishop M, Cannings C, editors. *Handbook of statistical genetics*. Wiley Online Library; 2001;: 327–350.
62. Yang ZH, Nielsen R, Goldman N, Pedersen A. Codon-substitution models for heterogeneous selection pressure at amino acid sites. *Genetics*. Genetics Society of America; 2000;155: 431–449.
63. Yang Z. PAML 4: Phylogenetic analysis by maximum likelihood. *Mol Biol Evol*. 2007;24: 1586–1591. doi:10.1093/molbev/msm088
64. Liti G, Carter DM, Moses AM, Warringer J, Parts L, James SA, et al. Population

- genomics of domestic and wild yeasts. *Nature*. 2009;458: 337–341. doi:10.1038/nature07743
65. Naumov G, Naumova E, Masneuf-Pomarède I. Genetic identification of new biological species *Saccharomyces arboricolus* Wang et Bai. *Antonie Van Leeuwenhoek*. 2010;98: 1–7.
66. Scannell DR, Zill OA, Rokas A, Payen C, Dunham MJ, Eisen MB, et al. The awesome power of yeast evolutionary genetics: New genome sequences and strain resources for the *Saccharomyces sensu stricto* genus. *G3 (Bethesda)*. 2011;1: 11–25. doi:10.1534/g3.111.000273
67. Pond SLK, Frost SDW. Datamonkey: rapid detection of selective pressure on individual sites of codon alignments. *Bioinformatics*. Oxford University Press; 2005;21: 2531–2533. doi:10.1093/bioinformatics/bti320
68. Curcio MJ, Garfinkel DJ. Single-step selection for Ty1 element retrotransposition. *Proc Natl Acad Sci U S A*. 1991;88: 936–940.
69. Marshall KS, Zhang Z, Curran J, Derbyshire S, Mymryk JS. An improved genetic system for detection and analysis of protein nuclear import signals. *BMC Mol Biol*. 2007;8: 6. doi:10.1186/1471-2199-8-6
70. Kaffman A, Rank NM, O'Shea EK. Phosphorylation regulates association of the transcription factor Pho4 with its import receptor Pse1/Kap121. *Genes Dev*. 1998;12: 2673–2683.
71. Checkley MA, Nagashima K, Lockett SJ, Nyswaner KM, Garfinkel DJ. P-body components are required for Ty1 retrotransposition during assembly of retrotransposition-competent virus-like particles. *Mol Cell Biol*. 2010;30: 382–398. doi:10.1128/MCB.00251-09
72. Chalker DL, Sandmeyer SB. Transfer RNA genes are genomic targets for de Novo transposition of the yeast retrotransposon Ty3. *Genetics*. Genetics Society of America; 1990;126: 837–850.
73. Sadeghi N, Rütz ML, Menees TM. Thermal blockage of viruslike particle formation for the yeast retrotransposon Ty3 reveals differences in the cellular stress response. *Arch Virol*. 2001;146: 1919–1934.
74. Bilanchone VW, Claypool JA, Kinsey PT, Sandmeyer SB. Positive and negative regulatory elements control expression of the yeast retrotransposon Ty3. *Genetics*. Genetics; 1993;134: 685–700.
75. Yoshida K, Seo H-S, Debler EW, Blobel G, Hoelz A. Structural and functional analysis of an essential nucleoporin heterotrimer on the cytoplasmic face of the nuclear pore complex. *Proc Natl Acad Sci U S A*. 2011;108: 16571–16576. doi:10.1073/pnas.1112846108
76. Tong AHY. Systematic Genetic Analysis with Ordered Arrays of Yeast Deletion Mutants. *Science*. 2001;294: 2364–2368. doi:10.1126/science.1065810



77. Xie X, Qiu W-G, Lipke PN. Accelerated and adaptive evolution of yeast sexual adhesins. *Mol Biol Evol.* 2011;28: 3127–3137. doi:10.1093/molbev/msr145
78. Greig D, Travisano M. The Prisoner's Dilemma and polymorphism in yeast *SUC* genes. *Proc Biol Sci.* 2004;271: S25–6. doi:10.1098/rsbl.2003.0083
79. Smith C, Greig D. The cost of sexual signaling in yeast. *Evolution.* 2010;64: 3114–3122. doi:10.1111/j.1558-5646.2010.01069.x
80. Bensasson D, Zarowiecki M, Burt A, Koufopanou V. Rapid evolution of yeast centromeres in the absence of drive. *Genetics.* 2008;178: 2161–2167. doi:10.1534/genetics.107.083980
81. Pieczynska MD, Wloch-Salamon D, Korona R, de Visser JAGM. Rapid multiple-level coevolution in experimental populations of yeast killer and nonkiller strains. *Evolution.* 2016;70: 1342–1353. doi:10.1111/evo.12945
82. Damelin M, Silver PA. Mapping interactions between nuclear transport factors in living cells reveals pathways through the nuclear pore complex. *Mol Cell.* 2000;5: 133–140.
83. Lutzmann M, Kunze R, Stangl K, Stelter P, Tóth KF, Böttcher B, et al. Reconstitution of Nup157 and Nup145N into the Nup84 complex. *J Biol Chem.* 2005;280: 18442–18451. doi:10.1074/jbc.M412787200
84. Patel SS, Rexach MF. Discovering Novel Interactions at the Nuclear Pore Complex Using Bead Halo: A Rapid Method for Detecting Molecular Interactions of High and Low Affinity at Equilibrium. *Mol Cell Proteomics.* 2007;7: 121–131. doi:10.1074/mcp.M700407-MCP200
85. Belanger KD, Gupta A, MacDonald KM, Ott CM, Hodge CA, Cole CM, et al. Nuclear pore complex function in *Saccharomyces cerevisiae* is influenced by glycosylation of the transmembrane nucleoporin Pom152p. *Genetics.* 2005;171: 935–947. doi:10.1534/genetics.104.036319
86. Moore SP, Liti G, Stefanisko KM, Nyswaner KM, Chang C, Louis EJ, et al. Analysis of a Ty1-less variant of *Saccharomyces paradoxus*: the gain and loss of Ty1 elements. *Yeast.* 2004;21: 649–660. doi:10.1002/yea.1129
87. Schacherer J, Shapiro JA, Ruderfer DM, Kruglyak L. Comprehensive polymorphism survey elucidates population structure of *Saccharomyces cerevisiae*. *Nature.* 2009;458: 342–345. doi:10.1038/nature07670
88. Bleykasten-Grosshans C, Friedrich A, Schacherer J. Genome-wide analysis of intraspecific transposon diversity in yeast. *BMC Genomics.* BMC Genomics; 2013;14: 1–1. doi:10.1186/1471-2164-14-399
89. Bleykasten-Grosshans C, Jung PP, Fritsch ES, Potier S, de Montigny J, Souciet J-L. The Ty1 LTR-retrotransposon population in *Saccharomyces cerevisiae* genome: dynamics and sequence variations during mobility. *FEMS Yeast Res.* 2011;11: 334–344. doi:10.1111/j.1567-1364.2011.00721.x

90. Zhang H, Zeidler AFB, Song W, Puccia CM, Malc E, Greenwell PW, et al. Gene copy-number variation in haploid and diploid strains of the yeast *Saccharomyces cerevisiae*. *Genetics*. 2013;193: 785–801. doi:10.1534/genetics.112.146522
91. Roeder GS, Fink GR. DNA rearrangements associated with a transposable element in yeast. *Cell*. 1980;21: 239–249.
92. Servant G, Penner C, Lesage P. Remodeling yeast gene transcription by activating the Ty1 long terminal repeat retrotransposon under severe adenine deficiency. *Mol Cell Biol*. 2008;28: 5543–5554. doi:10.1128/MCB.00416-08
93. Chang S-L, Lai H-Y, Tung S-Y, Leu J-Y. Dynamic Large-Scale Chromosomal Rearrangements Fuel Rapid Adaptation in Yeast Populations. Fay JC, editor. *PLoS Genet*. 2013;9: e1003232–15. doi:10.1371/journal.pgen.1003232
94. Sistla S, Pang JV, Wang CX, Balasundaram D. Multiple conserved domains of the nucleoporin Nup124p and its orthologs Nup1p and Nup153 are critical for nuclear import and activity of the fission yeast Tf1 retrotransposon. *Mol Biol Cell*. 2007;18: 3692–3708. doi:10.1091/mbc.E06-12-1062
95. Varadarajan P, Mahalingam S, Liu P, Ng SBH, Gandotra S, Dorairajoo DSK, et al. The functionally conserved nucleoporins Nup124p from fission yeast and the human Nup153 mediate nuclear import and activity of the Tf1 retrotransposon and HIV-1 Vpr. *Mol Biol Cell*. 2005;16: 1823–1838. doi:10.1091/mbc.E04-07-0583
96. Price AJ, Jacques DA, McEwan WA, Fletcher AJ, Essig S, Chin JW, et al. Host Cofactors and Pharmacologic Ligands Share an Essential Interface in HIV-1 Capsid That Is Lost upon Disassembly. Cullen BR, editor. *PLoS Pathog*. 2014;10: e1004459–17. doi:10.1371/journal.ppat.1004459
97. Brass AL, Dykxhoorn DM, Benita Y, Yan N, Engelman A, Xavier RJ, et al. Identification of Host Proteins Required for HIV Infection Through a Functional Genomic Screen. *Science*. 2008;319: 921–926. doi:10.1126/science.1152725
98. König R, Zhou Y, Elleder D, Diamond TL, Bonamy GMC, Irelan JT, et al. Global Analysis of Host-Pathogen Interactions that Regulate Early-Stage HIV-1 Replication. *Cell*. 2008;135: 49–60. doi:10.1016/j.cell.2008.07.032
99. König R, Stertz S, Zhou Y, Inoue A, Hoffmann HH, Bhattacharyya S, et al. Human host factors required for influenza virus replication. *Nature*. Nature Publishing Group; 2010;463: 813–817. doi:10.1038/nature08699
100. Di Nunzio F, Danckaert A, Fricke T, Perez P, Fernandez J, Perret E, et al. Human Nucleoporins Promote HIV-1 Docking at the Nuclear Pore, Nuclear Import and Integration. Chauhan A, editor. *PLoS ONE*. 2012;7: e46037–15. doi:10.1371/journal.pone.0046037
101. Lussignol M, Kopp M, Molloy K, Vizcay-Barrena G, Fleck RA, Dorner M, et al. Proteomics of HCV virions reveals an essential role for the nucleoporin Nup98 in



- virus morphogenesis. Proc Natl Acad Sci U S A. National Acad Sciences; 2016;113: 2484–2489. doi:10.1073/pnas.1518934113
102. Price AJ, Fletcher AJ, Schaller T, Elliott T, Lee K, KewalRamani VN, et al. CPSF6 defines a conserved capsid interface that modulates HIV-1 replication. PLoS Pathog. 2012;8: e1002896. doi:10.1371/journal.ppat.1002896
103. Matreyek KA, Engelman A. The Requirement for Nucleoporin NUP153 during Human Immunodeficiency Virus Type 1 Infection Is Determined by the Viral Capsid. J Virol. 2011;85: 7818–7827. doi:10.1128/JVI.00325-11
104. Brass AL, Huang I-C, Benita Y, John SP, Krishnan MN, Feeley EM, et al. The IFITM proteins mediate cellular resistance to influenza A H1N1 virus, West Nile virus, and dengue virus. Cell. 2009;139: 1243–1254. doi:10.1016/j.cell.2009.12.017
105. Enard D, Cai L, Gwennap C, Petrov DA. Viruses are a dominant driver of protein adaptation in mammals. eLife. eLife Sciences Publications Limited; 2016;5. doi:10.7554/eLife.12469
106. Ng M, Ndungo E, Kaczmarek ME, Herbert AS, Binger T. Filovirus receptor NPC1 contributes to species-specific patterns of ebolavirus susceptibility in bats. eLife. 2015. doi:10.7554/eLife.11785.001
107. Kaelber JT, Demogines A, Harbison CE, Allison AB, Goodman LB, Ortega AN, et al. Evolutionary reconstructions of the transferrin receptor of Caniforms supports canine parvovirus being a re-emerged and not a novel pathogen in dogs. Villarreal L, editor. PLoS Pathog. 2012;8: e1002666. doi:10.1371/journal.ppat.1002666.t002
108. Demogines A, Abraham J, Choe H, Farzan M, Sawyer SL. Dual Host-Virus Arms Races Shape an Essential Housekeeping Protein. Sugden B, editor. PLoS Biol. 2013;11: e1001571–13. doi:10.1371/journal.pbio.1001571
109. Zhang ZD, Weinstock G, Gerstein M. Rapid Evolution by Positive Darwinian Selection in T-Cell Antigen CD4 in Primates. J Mol Evol. 2008;66: 446–456. doi:10.1007/s00239-008-9097-1
110. Martin C, Buckler-White A, Wollenberg K, Kozak CA. The avian XPR1 gammaretrovirus receptor is under positive selection and is disabled in bird species in contact with virus-infected wild mice. J Virol. American Society for Microbiology; 2013;87: 10094–10104. doi:10.1128/JVI.01327-13
111. Lou DI, Kim ET, Meyerson NR, Pancholi NJ, Mohni KN, Enard D, et al. An Intrinsically Disordered Region of the DNA Repair Protein Nbs1 Is a Species-Specific Barrier to Herpes Simplex Virus 1 in Primates. Cell Host Microbe. Elsevier Inc; 2016;20: 178–188. doi:10.1016/j.chom.2016.07.003
112. Yoshimatsu T, Nagawa F. Control of gene expression by artificial introns in *Saccharomyces cerevisiae*. Science. 1989;244: 1346–1348.

113. Schatz P. Plasmid construction by homologous recombination in yeast. *Gene*. 1987;58: 201–216.
114. Suyama M, Torrents D, Bork P. PAL2NAL: robust conversion of protein sequence alignments into the corresponding codon alignments. *Nucleic Acids Res*. Oxford University Press; 2006;34: 609–612. doi:10.1093/nar/gkl315
115. Baudin A, Ozier-Kalogeropoulos O, Denouel A, Lacroute F, Cullin C. A simple and efficient method for direct gene deletion in *Saccharomyces cerevisiae*. *Nucleic Acids Res*. 1993;21: 3329–3330.
116. Kaiser C, Michaelis S, Mitchell A, Laboratory CSH. *Methods in yeast genetics*. Cold Spring Harbor Laboratory Pr; 1994.
117. Wong MCVL, Scott-Drew SRS, Hayes MJ, Howard PJ, Murray JAH. RSC2, Encoding a Component of the RSC Nucleosome Remodeling Complex, Is Essential for 2 m Plasmid Maintenance in *Saccharomyces cerevisiae*. *Mol Cell Biol*. 2002;22: 4218–4229. doi:10.1128/MCB.22.12.4218-4229.2002
118. Brachmann CB, Davies A, Cost GJ, Caputo E, Li JC, Hieter P, et al. Designer deletion strains derived from *Saccharomyces cerevisiae* S288C: a useful set of strains and plasmids for PCR-mediated gene disruption and other applications. *Yeast*. 1998;14: 115–132. doi:10.1002/(SICI)1097-0061(19980130)14:2<115::AID-YEA204>3.0.CO;2-2
119. Giaever G, Chu AM, Ni L, Connelly C, Riles L, Véronneau S, et al. Functional profiling of the *Saccharomyces cerevisiae* genome. *Nature*. 2002;418: 387–391. doi:10.1038/nature00935

# Supporting Information. Supplementary Figure Legend

A

| Lead Author    | Ty Element | Vector               | Promoter    | Cell type     | Selection        | Total genes | NPC/KAP genes |
|----------------|------------|----------------------|-------------|---------------|------------------|-------------|---------------|
| Scholes        | Ty1        | Chromosome           | native      | Haploid       | <i>HIS3</i> (AI) | 159         | 0 / 1         |
| Griffith       | Ty1        | Plasmid - <i>CEN</i> | <i>GAL1</i> | Homo. diploid | <i>HIS3</i>      | 273         | 2 / 1         |
| Aye            | Ty3        | Plasmid - <i>CEN</i> | <i>GAL1</i> | Haploid       | Target locus     | 45          | 3 / 0         |
| Irwin          | Ty3        | Plasmid - 2 $\mu$ m  | <i>GAL1</i> | Haploid       | <i>HIS3</i>      | 249         | 5 / 2         |
| Nyswaner       | Ty1        | Chromosome           | <i>GAL1</i> | Haploid       | <i>HIS3</i> (AI) | 91          | 0 / 0         |
| Dakshinamurthy | Ty1        | Plasmid - <i>CEN</i> | <i>GAL1</i> | Haploid       | <i>HIS3</i> (AI) | 112         | 2 / 3         |

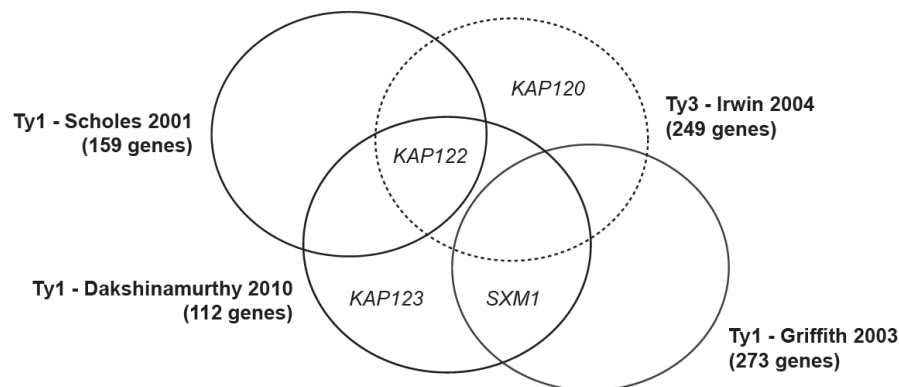

B

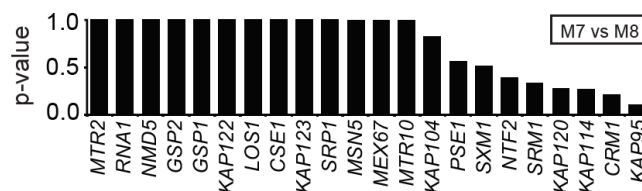

**Figure S1. Nucleoporins and karyopherins are important for Ty retrotransposition, but karyopherins are not evolving rapidly.** (A) A summary of whole genome studies that have identified nucleoporins and karyopherins important for Ty1 and Ty3 retrotransposition [51-56]. (B) Results from PAML analysis surveying karyopherins for signatures of positive selection, comparing a codon model of purifying selection (M7) to a codon model of positive selection (M8). No karyopherins had a  $p < 0.05$ .

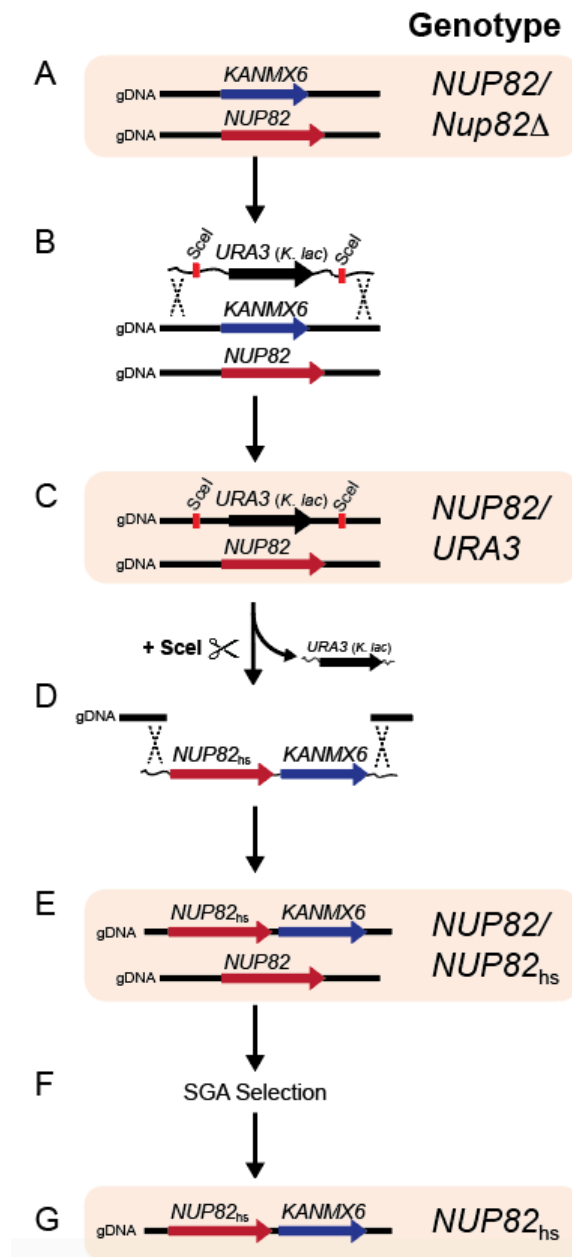

**Figure S2. The construction of *S. cerevisiae* strains expressing heterospecific *NUP82*.** The *KANMX6* gene within a diploid strain of *S. cerevisiae* heterozygous for *KANMX6* at one *NUP82* locus (A) was replaced with the *URA3* gene from *K. lactis* flanked by *Scel* sites (B-C). *Scel* restriction endonuclease was used to create double-stranded DNA breaks at the *URA3*-containing *NUP82* locus, which was simultaneously

repaired by a PCR-derived cassette encoding heterospecific *NUP82* and *KANMX6* (D-E).

Haploid clones were isolated using the SGA selection protocol [76] (F-G).

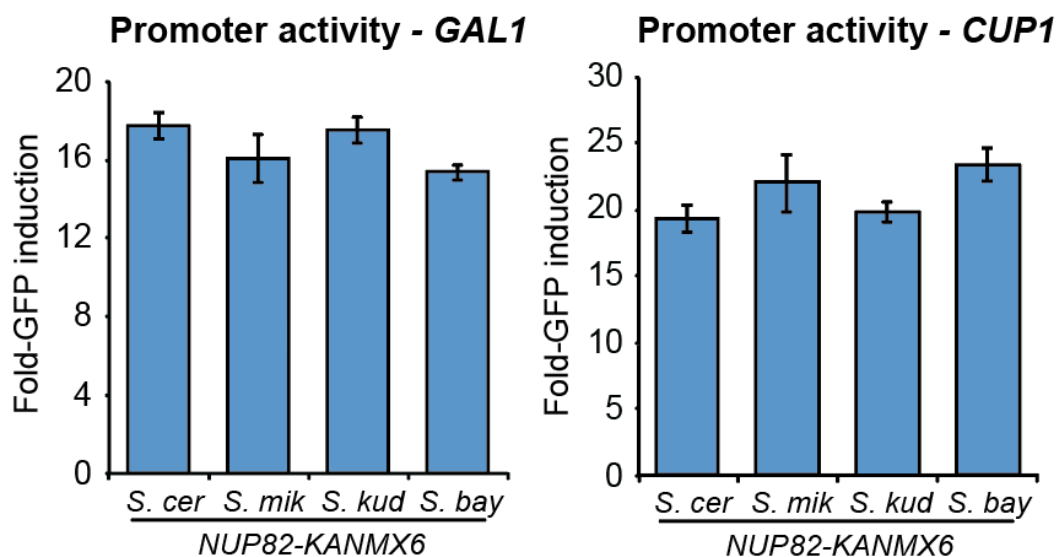

**Figure S3. The evolution of *NUP82* does not impact GFP production from different promoters.** The effect of *NUP84* complementation on the ability of *S. cerevisiae* to express GFP from the promoters used in our Ty1 *GFP*-based reporter (*GAL1* or *CUP1* promoters).



**Table S1 – Plasmids**

| Plasmid                                        | Details                                                                     | Markers                     | Source                  |
|------------------------------------------------|-----------------------------------------------------------------------------|-----------------------------|-------------------------|
| pNOP-GFP-<br><i>NUP82</i> <sup>DFY-LILLF</sup> | <i>NUP82</i> mutant expression vector tagged with GFP.                      | <i>LEU2</i> ,<br><i>CEN</i> | Yoshida et al.<br>[75]  |
| pJMB1076n                                      | LexA-MBP-Gal4(AD) nuclear import assay +ve control.                         | <i>LEU2</i> ,<br><i>CEN</i> | Marshall et al.<br>[69] |
| pGTy1-HIS3(AI)                                 | <i>GAL-1</i> inducible Ty1( <i>HIS3</i> (AI))                               | <i>URA3</i> ,<br><i>2μm</i> | Curcio et al.[68]       |
| Ty3-HIS3(AI)                                   | <i>GAL-1</i> inducible Ty3( <i>HIS3</i> (AI))                               | ?????                       | ?????                   |
| pEB0836                                        | Pho4(140-156aa) fused to three GFP under the <i>PHO4</i> promoter           | <i>URA3</i> ,<br><i>CEN</i> | Kaffman et al.<br>[70]  |
| pPAR061                                        | GFP(AI) cloned into pAG423-GAL-ccdB                                         | <i>HIS3</i> , <i>2μm</i>    | This study              |
| pPAR063                                        | GFP(ACT1i) cloned into pAG423-GAL-ccdB                                      | <i>HIS3</i> , <i>2μm</i>    | This study              |
| pPAR078                                        | pGTy1-HIS3(AI) with <i>HIS3</i> (AI) replaced with CUP1-GFP(ACT1i)          | <i>URA3</i> ,<br><i>2μm</i> | This study              |
| pPAR101                                        | FLAG- <i>NUP82</i> <sup>DFY-LILLF</sup> (1-458) cloned into pAG414-GPD-ccdB | <i>TRP</i> , <i>CEN</i>     | This study              |
| pPAR104                                        | FLAG- <i>NUP82</i> <sup>DFY-LILLF</sup> cloned into pAG414-GPD-ccdB         | <i>TRP</i> , <i>CEN</i>     | This study              |
| pPAR145                                        | FLAG- <i>NUP82</i> (433-713) cloned into pAG414-GPD-ccdB                    | <i>TRP</i> , <i>CEN</i>     | This study              |
| pPAR181                                        | FLAG- <i>MET17</i> cloned into pAG414-GPD-ccdB                              | <i>TRP</i> , <i>CEN</i>     | This study              |
| pPAR198                                        | LexA-MBP-GAL4(AD) +SV40 NLS cloned                                          | <i>HIS3</i> , <i>CEN</i>    | This study              |

|         |                                                                                                   |                                              |            |
|---------|---------------------------------------------------------------------------------------------------|----------------------------------------------|------------|
|         | into pAG413-GAL-eGFP-ccdB                                                                         |                                              |            |
| pPAR199 | LexA-MBP-GAL4(AD) cloned into pAG413-GAL-eGFP-ccdB                                                | <i>HIS3</i> , <i>CEN</i>                     | This study |
| pPAR200 | <i>NUP84 S. cerevisiae</i> with <i>LEU2</i> and flanking sequence from the <i>NUP84 locus</i>     | <i>URA3</i> ,<br><i>LEU2</i> , $2\mu m$      | This study |
| pPAR201 | <i>NUP82 S. cerevisiae</i> with <i>KANMX6</i> and flanking sequence from the <i>NUP82 locus</i>   | <i>URA3</i> ,<br><i>LEU2</i> , $2\mu m$      | This study |
| pPAR207 | <i>NUP84 S. mikatae</i> with <i>LEU2</i> and flanking sequence from the <i>NUP84 locus</i>        | <i>URA3</i> ,<br><i>LEU2</i> , $2\mu m$      | This study |
| pPAR208 | <i>NUP84 S. bayanus</i> with <i>LEU2</i> and flanking sequence from the <i>NUP84 locus</i>        | <i>URA3</i> ,<br><i>LEU2</i> , $2\mu m$      | This study |
| pPAR209 | <i>NUP84 S. kudriavzevii</i> with <i>LEU2</i> and flanking sequence from the <i>NUP84 locus</i>   | <i>URA3</i> ,<br><i>LEU2</i> , $2\mu m$      | This study |
| pPAR211 | <i>NUP82 S. bayanus</i> with <i>KANMX6</i> and flanking sequence from the <i>NUP82 locus</i>      | <i>URA3</i> ,<br><i>KANMX6</i> ,<br>$2\mu m$ | This study |
| pPAR212 | <i>NUP82 S. kudriavzevii</i> with <i>KANMX6</i> and flanking sequence from the <i>NUP82 locus</i> | <i>URA3</i> ,<br><i>KANMX6</i> ,<br>$2\mu m$ | This study |
| pPAR213 | <i>NUP82 S. mikatae</i> with <i>KANMX6</i> and flanking sequence from the <i>NUP82 locus</i>      | <i>URA3</i> ,<br><i>KANMX6</i> ,<br>$2\mu m$ | This study |
| pPAR240 | <i>URA3</i> -8opLexA-LacZ flanked by 1000bp of <i>ADE2</i> within pRS422                          | <i>URA3</i> ,<br>$2\mu m$                    | This study |



|            |                                                                                              |                                 |            |
|------------|----------------------------------------------------------------------------------------------|---------------------------------|------------|
| pCMY-IT5   | <i>K. lactis</i> <i>URA3</i> flanked by two inverted<br>SceI endonuclease recognition sites. | <i>K. lactis</i><br><i>URA3</i> | C. Yellman |
| pGAL1-SCEK | SceI endonuclease under the control of<br>the <i>GAL1</i> promoter.                          | <i>CEN</i> ,<br><i>KANMX</i>    | C. Yellman |

**Table S2 – Yeast strains**

| Strain                     | Genotype                                                                                                                                        | Source                         |
|----------------------------|-------------------------------------------------------------------------------------------------------------------------------------------------|--------------------------------|
| BY4741                     | MATa <i>his3Δ1 leu2Δ0 met15Δ0 ura3Δ0</i>                                                                                                        | [118]                          |
| BY4743 <i>nup82Δ/NUP82</i> | MATa/α <i>ura3Δ0 leu2Δ0 his3Δ1</i><br><i>LYS2+/lys2Δ0 met15Δ0/MET15+</i><br><i>can1Δ::LEU2+-MFA1pr-HIS3/CAN1+</i><br><i>nup82Δ::KANMX/NUP82</i> | SGA KO collection<br>[76]      |
| BY4741 <i>xrn1Δ</i>        | MATa <i>his3Δ1 leu2Δ0 met15Δ0 ura3Δ0</i><br><i>xrn1Δ</i>                                                                                        | Haploid KO<br>collection [119] |
| BY4741 <i>nup84Δ</i>       | MATa <i>his3Δ1 leu2Δ0 met15Δ0 ura3Δ0</i><br><i>nup84Δ</i>                                                                                       | Haploid KO<br>collection [119] |
| BY4741 <i>nup133Δ</i>      | MATa <i>his3Δ1 leu2Δ0 met15Δ0 ura3Δ0</i><br><i>nup133Δ</i>                                                                                      | Haploid KO<br>collection [119] |
| BY4741 <i>bud22Δ</i>       | MATa <i>his3Δ1 leu2Δ0 met15Δ0 ura3Δ0</i><br><i>bud22Δ</i>                                                                                       | Haploid KO<br>collection [119] |
| BY4741 <i>xrs2Δ</i>        | MATa <i>his3Δ1 leu2Δ0 met15Δ0 ura3Δ0</i><br><i>xrs2Δ</i>                                                                                        | Haploid KO<br>collection [119] |
| BY4741 <i>nup100Δ</i>      | MATa <i>his3Δ1 leu2Δ0 met15Δ0 ura3Δ0</i><br><i>nup100Δ</i>                                                                                      | Haploid KO<br>collection [119] |
| BY4741 <i>nup84Δ</i>       | MATa <i>his3Δ1 leu2Δ0 met15Δ0 ura3Δ0</i><br><i>nup84Δ</i>                                                                                       | Haploid KO<br>collection [119] |
| YPAR0130                   | MATa <i>his3Δ1 leu2Δ0 met15Δ0 ura3Δ0</i><br><i>nup84Δ::NUP84-LEU2 (S. cerevisiae)</i>                                                           | This study                     |
| YPAR0131                   | MATa <i>his3Δ1 leu2Δ0 met15Δ0 ura3Δ0</i>                                                                                                        | This study                     |

|          |                                                                                                                               |            |
|----------|-------------------------------------------------------------------------------------------------------------------------------|------------|
|          | <i>nup84Δ::NUP84-LEU2 (S. mikatae)</i>                                                                                        |            |
| YPAR0132 | MATa <i>his3Δ1 leu2Δ0 met15Δ0 ura3Δ0</i><br><i>nup84Δ::NUP84-LEU2 (S. bayanus)</i>                                            | This study |
| YPAR0133 | MATa <i>his3Δ1 leu2Δ0 met15Δ0 ura3Δ0</i><br><i>nup84Δ::NUP84-LEU2 (S. kudriavzevii)</i>                                       | This study |
| YPAR0135 | MATa <i>his3Δ1 leu2Δ0 met15Δ0 ura3Δ0</i><br><i>nup84Δ::NUP84-LEU2 (S. cerevisiae)</i><br><i>ade2::URA3::(LexAop)8-LacZ</i>    | This study |
| YPAR0137 | MATa <i>his3Δ1 leu2Δ0 met15Δ0 ura3Δ0</i><br><i>nup84Δ::NUP84-LEU2 (S. mikatae)</i><br><i>ade2::URA3::(LexAop)8-LacZ</i>       | This study |
| YPAR0136 | MATa <i>his3Δ1 leu2Δ0 met15Δ0 ura3Δ0</i><br><i>nup84Δ::NUP84-LEU2 (S. bayanus)</i><br><i>ade2::URA3::(LexAop)8-LacZ</i>       | This study |
| YPAR0138 | MATa <i>his3Δ1 leu2Δ0 met15Δ0 ura3Δ0</i><br><i>nup84Δ::NUP84-LEU2 (S. kudriavzevii)</i><br><i>ade2::URA3::(LexAop)8-LacZ</i>  | This study |
| YPAR0139 | MATa <i>ura3Δ0 leu2Δ0 his3Δ1</i><br><i>can1Δ::LEU2+-MFA1pr-HIS3</i><br><i>nup82Δ::NUP82 (S. cerevisiae)-</i><br><i>KANMX6</i> | This study |
| YPAR0143 | MATa <i>ura3Δ0 leu2Δ0 his3Δ1</i><br><i>can1Δ::LEU2+-MFA1pr-HIS3</i><br><i>nup82Δ::NUP82 (S. mikatae)-</i>                     | This study |

|          |                                                                                                                                         |            |
|----------|-----------------------------------------------------------------------------------------------------------------------------------------|------------|
|          | KANMX6                                                                                                                                  |            |
| YPAR0141 | MATa <i>ura3Δ0 leu2Δ0 his3Δ1</i><br><i>can1Δ::LEU2+-MFA1pr-HIS3</i><br><i>nup82Δ::NUP82 (S. kudriavzevii)-</i><br>KANMX6                | This study |
| YPAR0142 | MATa <i>ura3Δ0 leu2Δ0 his3Δ1</i><br><i>can1Δ::LEU2+-MFA1pr-HIS3</i><br><i>nup82Δ::NUP82 (S. bayanus)-</i><br>KANMX6                     | This study |
| YPAR0143 | MATa <i>ura3Δ0 leu2Δ0 his3Δ1</i><br><i>can1Δ::LEU2+-MFA1pr-his3Δ::HPHX6</i><br><i>nup82Δ::NUP82 (S. cerevisiae)-</i><br>KANMX6          | This study |
| YPAR0145 | MATa <i>ura3Δ0 leu2Δ0 his3Δ1</i><br><i>can1Δ::LEU2+-MFA1pr-</i><br><i>his3Δ::HPHX6 nup82Δ::NUP82 (S.</i><br><i>mikatae)-KANMX6</i>      | This study |
| YPAR0147 | MATa <i>ura3Δ0 leu2Δ0 his3Δ1</i><br><i>can1Δ::LEU2+-MFA1pr-</i><br><i>his3Δ::HPHX6 nup82Δ::NUP82 (S.</i><br><i>kudriavzevii)-KANMX6</i> | This study |
| YPAR0149 | MATa <i>ura3Δ0 leu2Δ0 his3Δ1</i><br><i>can1Δ::LEU2+-MFA1pr-</i>                                                                         | This study |

|  |                                                       |  |
|--|-------------------------------------------------------|--|
|  | <i>his3Δ::HPHX6 nup82Δ::NUP82 (S. bayanus)-KANMX6</i> |  |
|--|-------------------------------------------------------|--|
